1 **Title: Pattern-recognition receptors are required for NLR-mediated plant**  
2 **immunity**

3 **Authors:** Minhong Yuan<sup>1,2</sup>, Zeyu Jiang<sup>1,2</sup>, Guozhi Bi<sup>3,4</sup>, Kinya Nomura<sup>5</sup>, Menghui Liu<sup>6</sup>, Sheng  
4 Yang He<sup>5,7</sup>, Jian-Min Zhou<sup>2,3,4</sup> and Xiu-Fang Xin<sup>1,2,8\*</sup>

5 **Affiliations:**

6 <sup>1</sup>National key Laboratory of Plant Molecular Genetics, CAS Center for Excellence in Molecular  
7 Plant Sciences, Institute of Plant Physiology and Ecology, Chinese Academy of Sciences,  
8 Shanghai, China.

9 <sup>2</sup>University of the Chinese Academy of Sciences, Beijing, China.

10 <sup>3</sup>State Key Laboratory of Plant Genomics, Institute of Genetics and Developmental Biology,  
11 Innovation Academy for Seed Design, Chinese Academy of Sciences, Beijing, China.

12 <sup>4</sup>CAS Center for Excellence in Biotic Interactions, University of Chinese Academy of Sciences,  
13 Beijing, China.

14 <sup>5</sup>Department of Energy Plant Research Laboratory, Plant Resilient Institute, Michigan State  
15 University, East Lansing, MI, USA.

16 <sup>6</sup>Key Laboratory of Plant Stress Biology, State Key Laboratory of Cotton Biology, School of  
17 Life Sciences, Henan University, Kaifeng, China.

18 <sup>7</sup>Howard Hughes Medical Institute, Michigan State University, East Lansing, MI, USA.

19 <sup>8</sup>CAS-JIC Center of Excellence for Plant and Microbial Sciences (CEPAMS), Institute of Plant  
20 Physiology and Ecology, Chinese Academy of Sciences, Shanghai, China.

21 \*Correspondence to Xiu-Fang Xin (xinxf@sippe.ac.cn)

22

23 **Abstract**

24 The plant immune system is fundamental to plant survival in natural ecosystems and productivity  
25 in crop fields. Substantial evidence supports the prevailing notion that plants possess a two-tiered  
26 innate immune system, called pattern-triggered immunity (PTI) and effector-triggered immunity  
27 (ETI). PTI is triggered by microbial patterns via cell surface-localized pattern-recognition  
28 receptors (PRRs), whereas ETI is activated by pathogen effector proteins via mostly  
29 intracellularly-localized receptors called nucleotide-binding, leucine-rich repeat proteins

30 (NLRs)<sup>1-4</sup>. PTI and ETI have traditionally been considered to act independently and have  
31 evolved sequentially<sup>5,6</sup>. Here we show that, contrary to the perception of PTI and ETI being  
32 separate immune signaling pathways, Arabidopsis PRR/co-receptor mutants, *fls2/efr/cerk1* and  
33 *bak1/bkk1/cerk1* triple mutants, are greatly impaired in ETI responses when challenged with  
34 incompatible *Pseudomonas syringae* bacteria. We further show that the NADPH oxidase  
35 (RBOHD)-mediated production of reactive oxygen species (ROS) is a critical early signaling  
36 event connecting PRR and NLR cascades and that PRR-mediated phosphorylation of RBOHD is  
37 necessary for full activation of RBOHD during ETI. Furthermore, NLR signaling rapidly  
38 augments the transcript and protein levels of key PTI components at an early stage and in a  
39 salicylic acid-independent manner. Our study supports an alternative model in which PTI is in  
40 fact an indispensable component of ETI during bacterial infection, implying that ETI halts  
41 pathogen infection, in part, by directly co-opting the anti-pathogen mechanisms proposed for  
42 PTI. This alternative model conceptually unites two major immune signaling pathways in the  
43 plant kingdom and mechanistically explains the long-observed similarities in downstream  
44 defense outputs between PTI and ETI.

45

## 46 **Main**

47 It is generally believed that PRRs and NLRs, with largely distinct activation mechanisms and  
48 subcellular localizations, mediate different immune signaling pathways. PRRs are cell surface-  
49 localized receptor-like kinases/proteins (RLKs/RLPs) with extracellular ligand-binding domain  
50 to sense conserved molecular patterns, ranging from bacterial flagellin to fungal chitin molecules  
51 from both pathogenic and nonpathogenic microbes. NLRs, on the other hand, are intracellular  
52 proteins that sense pathogen-derived effector proteins inside the plant cell and can be further  
53 classified into the coiled coil (CC)-type, Toll/interleukin-1 receptor (TIR)-type, or RPW8 (CC<sub>R</sub>)-  
54 type, depending on their N-terminal domain<sup>7</sup>. However, PRR- and NLR-mediated signaling  
55 pathways result in many similar downstream immune outputs, including defense gene  
56 expression, production of ROS and callose deposition at the plant cell wall<sup>8,9</sup>. The underlying  
57 reason is not clear and mechanistic relationship between the two immune pathways remains  
58 largely enigmatic. Notably, while many PRR signaling components have been identified and  
59 anti-pathogen mechanisms described, the downstream signaling events in ETI and how ETI halts

60 pathogen growth still remain poorly understood, despite recent breakthroughs in the  
61 understanding of NLR protein structures and activities<sup>10-13</sup>.

62

### 63 **Requirement of PRR/co-receptors for ETI**

64 Using *Arabidopsis thaliana*-*Pseudomonas syringae* pathosystem, we accidentally discovered a  
65 striking and unexpected role of PRR/co-receptors in ETI. Specifically, an “avirulent”, ETI-  
66 eliciting bacterial strain, *P. syringae* pv. *tomato* (*Pst*) DC3000(*avrRpt2*), which activates RPS2  
67 (Resistance to *P. syringae* 2)-dependent ETI in wild-type Col-0 plants<sup>14,15</sup>, failed to elicit  
68 effective ETI in two separate PRR/co-receptor *Arabidopsis* mutants, *fls2/efr/cerk1* (*fec*) and  
69 *bak1/bkk1/cerk1* (*bbc*) mutants, which are mutated in major PRR/co-receptors recognizing  
70 bacteria-associated molecular patterns<sup>16</sup>. As shown in Fig. 1a, the *fec* and *bbc* mutants did not  
71 mount an effective ETI against *Pst* DC3000(*avrRpt2*). To determine whether a requirement of  
72 PRR/co-receptors for ETI is specific to *Pst* DC3000(*avrRpt2*) or is a more general phenomenon,  
73 we tested two other ETI-triggering “avirulent” effectors, AvrPphB and AvrRps4, which are  
74 recognized by RPS5<sup>17</sup> and RPS4<sup>18</sup>, respectively, in *Arabidopsis* Col-0 accession. We found that  
75 the compromised ETI phenotype in *fec* and *bbc* mutants held true for both AvrPphB and  
76 AvrRps4 (Extended Data Fig. 1), suggesting a potentially broad role of PRR/co-receptors in ETI  
77 pathways. We subsequently focused on AvrRpt2-triggered ETI for in-depth characterization.  
78 Hypersensitive response (HR), manifested by fast cell death under high bacterial inoculum, is a  
79 hallmark of ETI. We tested HR phenotype in *fec* and *bbc* mutants in response to *Pst*  
80 DC3000(*avrRpt2*) and found that, even though HR cell death eventually occurs in these mutants,  
81 the rate was delayed, as shown by the compromised tissue collapse 7h after bacteria infiltration  
82 (Fig. 1b).

83

84 For the past several decades, conventional studies of ETI triggered by *Pst* DC3000 carrying  
85 “avirulent” effector genes have been performed in the presence of all 36 endogenous effector  
86 genes in *Pst* DC3000. Because during pathogen infection, both PTI and ETI are at play and  
87 because many of the endogenous effectors in *Pst* DC3000 are linked to interference of PTI  
88 and/or ETI via unclear mechanisms, it is not always easy to clearly interpret the relationship  
89 between PTI and ETI during infection by avirulent *Pst* DC3000 strains or other wild-type  
90 avirulent pathogens<sup>19-21</sup>. We took advantage of the recent availability of *Pst* DC3000 strain

91 D36E<sup>22</sup>, in which all 36 effector genes as well as coronatine biosynthesis genes are deleted and  
92 therefore is expected to activate only PTI, and D36E(*avrRpt2*) strain, which delivers only  
93 AvrRpt2 and activates both PTI and RPS2-mediated ETI with no interference from any  
94 endogenous *Pst* DC3000 effectors. Although D36E is greatly reduced in virulence compared to  
95 *Pst* DC3000 (Fig. 1a), we could still observe a robust AvrRpt2-induced ETI in Col-0 plants, with  
96 strain D36E(*avrRpt2*) growing significantly less than strain D36E (Fig. 1c). We found that  
97 AvrRpt2-triggered ETI was no longer detectable in either *fec* or *bbc* mutant (Fig. 1c),  
98 demonstrating that the requirement of PRR/co-receptors for AvrRpt2-triggered ETI was not  
99 caused by some hidden interactions between endogenous *Pst* DC3000 effectors/coronatine and  
100 Arabidopsis *fec* and *bbc* mutants.

### 101 102 **Requirement of PRR/co-receptors for ROS production in ETI**

103 Previous studies have shown that AvrRpt2 cleaves the plant protein RIN4 (RPM1-interacting  
104 protein 4), leading to activation of the NLR protein RPS2<sup>14,15</sup>. To understand why AvrRpt2-  
105 mediated ETI is lost in *fec* and *bbc* mutants, we examined the cleavage of the RIN4 protein by  
106 AvrRpt2. Results showed that D36E(*avrRpt2*)-induced RIN4 protein depletion was normal in the  
107 *fec* and *bbc* mutants compared to that in Col-0 plants (Fig. 1d). Gene expression analysis showed  
108 that *RPS2* transcript level is also similar in all genotypes after bacteria inoculation (Extended  
109 Data Fig. 2). We then sought to assay downstream signaling events of AvrRpt2-triggered ETI  
110 and examined MAPK phosphorylation level. Activation of RPS2 by AvrRpt2 is known to trigger  
111 a strong and more sustained MAPK activation, compared to that induced during PTI<sup>23</sup>. As shown  
112 in Fig. 1e, we observed strong ETI-associated MPK3/6 phosphorylation (i.e., at 4 or 8 h post  
113 inoculation) in Col-0 plants, which however remained intact in *fec* and *bbc* mutants.

114  
115 Another important immune response associated with both PTI and ETI is production of ROS,  
116 including superoxide and hydrogen peroxide (H<sub>2</sub>O<sub>2</sub>), which have been proposed to act as defense  
117 molecules that kill pathogens and signaling molecules that further activate immune responses<sup>24</sup>.  
118 Using luminol-horseradish peroxidase (HRP)-based method, we examined PTI- and ETI-  
119 associated ROS production in transgenic *avrRpt2* plants, in which *avrRpt2* expression is driven  
120 by a dexamethasone (DEX)-inducible promoter<sup>25</sup>. In this system, PTI and ETI activation can be  
121 initiated separately or in combination using PAMP (e.g., flg22, a 22-aa peptide derived from

122 bacterial flagellin) and DEX treatments in the absence of bacterial infection. As shown in Fig. 1f,  
123 flg22 alone triggered a fast and transient ROS burst as reported before<sup>26</sup>, while DEX-induced  
124 expression of AvrRpt2 alone triggered only a weak and kinetically slower ROS burst.  
125 Interestingly, co-treatment of flg22 and DEX triggered a strong and sustained second-phase ROS  
126 burst, peaking at 2h to 3h after treatment, and lasted for several hours (Fig. 1f, g), a profile that  
127 bears a striking similarity to previous observations during bacteria-triggered ETI<sup>27,28</sup>. This result  
128 raises an intriguing possibility that activation of PTI may be required for the production of a  
129 strong and sustained ROS characteristic of ETI. To test this hypothesis, we generated  
130 *bbc/DEX::avrRpt2* plants by transforming the *DEX::avrRpt2* construct into the *bbc* mutant plant  
131 (as well as Col-0 plant as control). Independent lines in which the *avrRpt2* expression level was  
132 similar or even higher than that in Col-0/*DEX::avrRpt2* plants were chosen (Extended Data Fig.  
133 3) for further analysis. As shown in Fig. 1h, i, in the *bbc/DEX::avrRpt2* plants, not only flg22-  
134 induced first-phase ROS is absent, but also the second-phase AvrRpt2-triggered ROS burst is  
135 almost completely abolished, clearly demonstrating a requirement of PRR/co-receptors for ETI-  
136 associated ROS production.

137  
138 To examine whether PTI- and ETI-associated ROS bursts are produced at the same or different  
139 subcellular compartments, ROS production was monitored with the fluorescent dye H<sub>2</sub>DCFDA,  
140 which can cross the plasma membrane of the plant cell and detect both apoplastic and cytosolic  
141 ROS<sup>29</sup>. As shown in Fig. 2a, strong fluorescent signal was detected in the apoplastic space of  
142 Col-0 leaves 5h post infiltration of D36E(*avrRpt2*). The apoplastic signal was much weaker in  
143 the *bbc* mutant plant, which was indistinguishable compared to the *rps2* control plant infiltrated  
144 with D36E(*avrRpt2*) or Col-0 plant infiltrated with D36E (Fig. 2a). Two classes of enzymes, the  
145 NADPH oxidases such as respiratory burst oxidase homolog D (RBOHD) and peroxidases, have  
146 been shown to be involved in generating apoplastic ROS in pathogen-infected plant leaves<sup>30,31</sup>.  
147 We therefore investigated which class is involved in the generation of AvrRpt2-triggered ROS  
148 by using chemical inhibitors diphenylene iodonium (DPI), which inhibits NADPH oxidases, and  
149 salicylhydroxamic acid (SHAM) and sodium azide, which inhibit peroxidase activities<sup>27,32</sup>. As  
150 shown in Extended Data Fig. 4a-c, co-treatment of DPI, but not SHAM or sodium azide, with  
151 flg22 and DEX almost completely blocked ETI-associated ROS and greatly compromised PTI-  
152 associated ROS. Interestingly, when we added these inhibitors at 40 min after flg22+DEX

153 treatment (i.e., after PTI-associated ROS and before the start of ETI-associated ROS), still only  
154 DPI, but not SHAM or sodium azide, almost completely blocked ETI-ROS (Fig. 2b), indicating  
155 that NADPH oxidases mediate ETI-associated ROS. We further tested whether NADPH oxidase  
156 RBOHD, which has been shown to play a prominent role in generating pathogen-induced  
157 ROS<sup>30,33,34</sup>, mediates the ETI-associated ROS. As shown in Fig. 2c, D36E(*avrRpt2*)-induced  
158 apoplastic ROS, as detected *in planta* by the H<sub>2</sub>DCFDA dye, was completely lost in the *rboh**d*  
159 plant. Consistently, we detected a much compromised ETI resistance against *Pst*  
160 DC3000(*avrRpt2*) in the *rboh**d* mutant plant (Fig. 2d, Extended Data Fig. 5b). Notably, *rboh**d*  
161 mutant plants grew to sizes that were similar to wild-type Col-0 plants under optimized growth  
162 conditions and, under these conditions, showed similar or even slightly enhanced susceptibility  
163 to *Pst* DC3000 (Fig. 2d, Extended Data Fig. 5a, b). Altogether, our results demonstrate a critical  
164 role of RBOHD in ETI and suggests RBOHD as a key molecular node connecting PTI and ETI.

165

### 166 **Coordination of PRR/co-receptors and NLR for activation of RBOHD**

167 We next assayed the transcript and protein level of RBOHD and found that the transcript (Fig.  
168 2e) and protein level (Fig. 2f) of RBOHD are induced both by D36E and, interestingly, to a much  
169 higher level, by D36E(*avrRpt2*) inoculation in Col-0 plant. Surprisingly, the strong induction of  
170 *RBOHD* transcript and protein by D36E(*avrRpt2*) occurred at a comparable level in *bbc* mutant  
171 plants (Fig. 2e, f). These results indicate that neither *RBOHD* transcript nor RBOHD protein  
172 accumulation accounts for the compromised ROS production in the *bbc* mutant and suggests an  
173 involvement of PRRs/PTI in post-translational regulation of RBOHD during ETI. Previous  
174 studies have reported several classes of kinases, including calcium dependent protein kinases  
175 (CPKs) and *Botrytis*-induced kinase 1 (BIK1), involved in phosphorylating RBOHD for ROS  
176 production<sup>33-37</sup>. We examined the ETI-ROS level in the *cpk5/6/11* quadruple mutant and *bik1*  
177 mutant plants, and found that ETI-associated ROS was reduced in *bik1* mutant but did not seem  
178 to be affected in *cpk5/6/11* mutant plant (Extended Data Fig. 6), suggesting that BIK1 contributes  
179 to the production of ETI-ROS. BIK1 was reported to rapidly and transiently (i.e. at 15min post-  
180 elicitation) phosphorylate RBOHD at multiple sites including S39, S343 and S347 during PTI  
181 activation<sup>33,34</sup>. We therefore examined RBOHD phosphorylation levels in protoplasts prepared  
182 from Col-0/*DEX::avrRpt2* and *bbc/DEX::avrRpt2* plants and transformed with an DNA construct

183 expressing FLAG-RBOHD. PTI and ETI in these protoplasts were activated by flg22 and DEX,  
184 respectively. A 35S promoter was used to express FLAG-RBOHD to ensure similar protein  
185 levels during various treatments. While no phosphorylation at S343/S347 in Col-0 protoplasts  
186 was detected 2.5h after treatment with flg22, DEX alone reproducibly induced a weak  
187 phosphorylation of S343/S347 in Col-0 protoplasts 2.5h after treatment (Fig. 2g). Strikingly, a  
188 flg22+DEX treatment induced a much stronger phosphorylation on S343/S347 in Col-0  
189 background 2.5h after treatment (Fig. 2g), suggesting a synergistic effect of PTI and ETI in  
190 phosphorylating RBOHD at S343/S347. In contrast, no phosphorylation was detected in the *bbc*  
191 background with flg22, DEX or flg22+DEX treatment, confirming the requirement of PRR/co-  
192 receptors for RBOHD phosphorylation during ETI. Our results illustrate the importance of two  
193 classes of immune receptors in the coordination of the abundance (i.e. by RPS2) and full activity  
194 (i.e. by PRRs) of RBOHD for generating robust ETI-ROS. Interestingly, S343/S347  
195 phosphorylation of RBOHD has previously been shown to be important for ETI resistance and  
196 restriction of bacterial growth<sup>38</sup>.

197

## 198 **Examination of PTI- and ETI-associated transcriptome**

199 The requirement of PRR/co-receptors for activation of RBOHD and a strong up-regulation of  
200 RBOHD during ETI (Fig. 2e, f) were intriguing to us and suggested that ETI may have evolved  
201 to co-opt RBOHD and other components of the PTI pathway as an integral part of its signaling  
202 mechanism. We therefore examined the expression patterns of other components of the PTI  
203 pathway and the rest of Arabidopsis transcriptome by RNAseq (Fig. 3a). Bacteria were infiltrated  
204 at a high dose (i.e.,  $\sim 2 \times 10^7$  cfu/mL) and expression was examined at early time points (i.e. 3h  
205 and 6h post infiltration) to ensure similar bacterial populations in Col-0 and *bbc* plants at the  
206 sampling times (Extended Data Fig. 7a). We found that, at 3h post infiltration, D36E(*avrRpt2*)  
207 already caused significant differential expression for many genes (i.e., more than 4,000 genes)  
208 compared to D36E in Col-0 plant (Extended Data Fig. 7b), suggesting that 3h is sufficient for  
209 delivery of AvrRpt2 into the plant cell and triggering strong ETI-associated gene expression. We  
210 therefore focused analysis on 3h time point in order to reveal early, and likely more direct,  
211 changes of ETI-associated gene expression. Many genes are differentially regulated at this early  
212 time point between Col-0 and *bbc* plants in response to PTI-inducing D36E (Fig. 3b), as

213 expected. Interestingly, the majority of these genes show similar expression pattern in Col-0 and  
214 *bbc* plants after D36E(*avrRpt2*) inoculation (Fig. 3b), suggesting that ETI can largely restore  
215 PTI-associated global gene expression in the *bbc* plant. Similar trends were observed for genes  
216 associated with salicylic acid, jasmonate and ethylene pathways (Extended Data Fig. 7c-e). We  
217 did notice that a subset of 272 genes were differentially expressed in *bbc* plants after  
218 D36E(*avrRpt2*) inoculation (Supplementary table 1). In particular, a cluster of *WRKY* genes  
219 including *WRKY22/29* and *FRK1* (*Flg22-induced Receptor-like Kinase 1*), which are canonical  
220 marker genes of flg22-induced PTI pathway<sup>39</sup>, are down-regulated in the *bbc* plant (Extended  
221 Data Fig. 8a, b). This suggests that, despite the general rescue of PTI-associated gene expression  
222 by ETI, the WRKY-FRK1 branch represents a unique immune branch, the activation of which  
223 during ETI requires PRR/co-receptors.

224

### 225 **Augmentation of key PTI components by ETI**

226 Further analysis of PTI- and ETI-associated transcriptomes revealed an interesting expression  
227 pattern for many PTI signaling genes. As shown in Fig. 3c, while PTI-inducing D36E can induce  
228 moderately many key PTI components, namely *BAK1*, *BIK1*, *XLG2/AGB1/AGG2*<sup>40</sup>, *MKK4/5* and  
229 *MPK3*, ETI-inducing D36E(*avrRpt2*) induced these genes to a much higher level. Similar to  
230 *RBOHD*, the strong activation of these PTI components by ETI is independent of PRR/co-  
231 receptors, since it occurs in the *bbc* mutant. Noticeably, *BIK1* and some other PBLs, but not  
232 *PBL1*, are strongly induced after D36E(*avrRpt2*) inoculation (Extended Data Fig. 9), suggesting  
233 differential contribution of different members of the *BIK1*/PBL family to ETI. Quantitative RT-  
234 PCR was performed to confirm the RNAseq results (Fig. 3d), and western blot further  
235 confirmed, at the protein level, the ETI up-regulation of several key components, including  
236 *BAK1*, *BIK1* and *MPK3* (Fig. 3e). Our results suggest that part of the *AvrRpt2*-ETI response is  
237 to ensure rapid high-level expression of key components of the PTI pathway, consistent with PTI  
238 being an essential component of ETI. We propose that this ETI-mediated up-regulation of PTI  
239 components is also likely an important part of a mechanism to overcome the negative regulation  
240 of PTI by endogenous “braking” systems of plants and exogenous pathogen effectors during  
241 infections<sup>2,41</sup>.

242



243 A previous study showed that SA signaling could up-regulate PRR protein level at a later stage  
244 (i.e., 24h after benzothiadiazole treatment)<sup>42</sup>. We therefore tested gene expression in the SA-  
245 deficient *sid2* plant and found that PTI components were still up-regulated by D36E(*avrRpt2*)  
246 (3h after inoculation) (Supplementary Fig. 10a). In addition, we examined our RNAseq dataset  
247 for the expression patterns of responsive genes to SA and N-hydroxy-pipecolic acid (NHP),  
248 which have been shown to function synergistically in plant immunity<sup>43,44</sup>. Our results showed  
249 that both SA- (Extended Data Fig. 7c) and NHP- (Extended Data Fig. 10b) responsive genes had  
250 similar transcript levels in Col-0 and *bbc* plants after D36E(*avrRpt2*) inoculation, suggesting  
251 intact SA/NHP signaling in the *bbc* mutant during AvrRpt2-ETI. Therefore, ETI appears to  
252 rapidly “re-enforce” the PTI pathway in a SA/NHP-independent manner.

253

## 254 Discussion

255 Our study reveals a surprising requirement of PRR/co-receptors for effective ETI and supports a  
256 mechanistic model in which ETI co-opts the PTI machinery, including the BIK1-RBOHD  
257 module, as an indispensable component (Fig. 4). In particular, we found that PRRs and NLRs,  
258 the two primary classes of plant immune receptors, function synergistically to ensure a fully  
259 “active status” as well as “robust level” of a key immune component, RBOHD, which mediates  
260 ETI-ROS generation and full disease resistance. We also identified PRR-mediated RBOHD  
261 phosphorylation at S343/S347 sites as one of the mechanistic links between PTI and ETI.

262

263 Our study sheds light on a long-standing puzzle in the field of plant immunity with respect to the  
264 enigmatic similarities in many PTI- and ETI-associated cellular defense features. Our model is  
265 supported by a parallel study by Ngou et al. (see back-to-back submission), who focus on the *P.*  
266 *syringae* effector AvrRps4 recognized by TIR-type NLRs (RPS4/RRS1), while we focus on  
267 RPS2, a CC-type NLR. Our complementary data suggest conservation of the discovered  
268 mechanism for two different types of NLRs, which account for the vast majority of pathogen-  
269 sensing NLRs in the plant kingdom. Intriguingly, synergistic interaction between cell surface and  
270 intracellular immune receptors in animals and humans has also been reported<sup>45-48</sup>, suggesting a  
271 possible conceptual parallel in immune receptor functions across kingdoms of life.

272

273 The demonstration of PTI as an integral component of ETI has significant implications in  
274 understanding how ETI resistance mechanisms prevent pathogen growth. Specifically, several  
275 PTI-associated anti-pathogen mechanisms have been described recently, including suppression of  
276 bacterial type III secretion<sup>49-51</sup>, inhibition of bacterial motility by lignification<sup>52</sup> and restriction of  
277 nutrient acquisition<sup>53</sup>. Our study suggests that ETI likely co-opts these PTI anti-pathogen  
278 mechanisms to halt pathogen growth. Our work could also have broad practical implications as  
279 well, as it suggests a possibility for carefully controlled augmentation of PTI components as a  
280 new strategy to broadly increase the effectiveness of ETI against numerous diseases in crop  
281 plants.

282

## 283 **References**

- 284 1 Yu, X., Feng, B., He, P. & Shan, L. From Chaos to Harmony: Responses and Signaling upon  
285 Microbial Pattern Recognition. *Annu Rev Phytopathol* **55**, 109-137, doi:10.1146/annurev-phyto-  
286 080516-035649 (2017).
- 287 2 Couto, D. & Zipfel, C. Regulation of pattern recognition receptor signalling in plants. *Nat Rev*  
288 *Immunol* **16**, 537-552, doi:10.1038/nri.2016.77 (2016).
- 289 3 Spoel, S. H. & Dong, X. How do plants achieve immunity? Defence without specialized immune  
290 cells. *Nat Rev Immunol* **12**, 89-100, doi:10.1038/nri3141 (2012).
- 291 4 Cui, H., Tsuda, K. & Parker, J. E. Effector-triggered immunity: from pathogen perception to  
292 robust defense. *Annu Rev Plant Biol* **66**, 487-511, doi:10.1146/annurev-arplant-050213-040012  
293 (2015).
- 294 5 Jones, J. D. & Dangl, J. L. The plant immune system. *Nature* **444**, 323-329,  
295 doi:10.1038/nature05286 (2006).
- 296 6 Chisholm, S. T., Coaker, G., Day, B. & Staskawicz, B. J. Host-microbe interactions: shaping the  
297 evolution of the plant immune response. *Cell* **124**, 803-814, doi:10.1016/j.cell.2006.02.008  
298 (2006).
- 299 7 Jones, J. D., Vance, R. E. & Dangl, J. L. Intracellular innate immune surveillance devices in plants  
300 and animals. *Science* **354**, doi:10.1126/science.aaf6395 (2016).
- 301 8 Tsuda, K. & Katagiri, F. Comparing signaling mechanisms engaged in pattern-triggered and  
302 effector-triggered immunity. *Curr Opin Plant Biol* **13**, 459-465, doi:10.1016/j.pbi.2010.04.006  
303 (2010).
- 304 9 Peng, Y., van Wersch, R. & Zhang, Y. Convergent and Divergent Signaling in PAMP-Triggered  
305 Immunity and Effector-Triggered Immunity. *Mol Plant Microbe Interact* **31**, 403-409,  
306 doi:10.1094/MPMI-06-17-0145-CR (2018).
- 307 10 Wang, J. *et al.* Reconstitution and structure of a plant NLR resistosome conferring immunity.  
308 *Science* **364**, doi:10.1126/science.aav5870 (2019).
- 309 11 Wang, J. *et al.* Ligand-triggered allosteric ADP release primes a plant NLR complex. *Science* **364**,  
310 doi:10.1126/science.aav5868 (2019).

- 311 12 Wan, L. *et al.* TIR domains of plant immune receptors are NAD<sup>+</sup>-cleaving enzymes that promote  
312 cell death. *Science* **365**, 799-803, doi:10.1126/science.aax1771 (2019).
- 313 13 Horsefield, S. *et al.* NAD<sup>+</sup> cleavage activity by animal and plant TIR domains in cell death  
314 pathways. *Science* **365**, 793-799, doi:10.1126/science.aax1911 (2019).
- 315 14 Axtell, M. J. & Staskawicz, B. J. Initiation of RPS2-specified disease resistance in Arabidopsis is  
316 coupled to the AvrRpt2-directed elimination of RIN4. *Cell* **112**, 369-377, doi:10.1016/s0092-  
317 8674(03)00036-9 (2003).
- 318 15 Mackey, D., Belkhadir, Y., Alonso, J. M., Ecker, J. R. & Dangl, J. L. Arabidopsis RIN4 is a target of  
319 the type III virulence effector AvrRpt2 and modulates RPS2-mediated resistance. *Cell* **112**, 379-  
320 389, doi:10.1016/s0092-8674(03)00040-0 (2003).
- 321 16 Xin, X. F. *et al.* Bacteria establish an aqueous living space in plants crucial for virulence. *Nature*  
322 **539**, 524-529, doi:10.1038/nature20166 (2016).
- 323 17 Shao, F. *et al.* Cleavage of Arabidopsis PBS1 by a bacterial type III effector. *Science* **301**, 1230-  
324 1233, doi:10.1126/science.1085671 (2003).
- 325 18 Gassmann, W., Hinsch, M. E. & Staskawicz, B. J. The Arabidopsis RPS4 bacterial-resistance gene  
326 is a member of the TIR-NBS-LRR family of disease-resistance genes. *Plant J* **20**, 265-277,  
327 doi:10.1046/j.1365-313x.1999.t01-1-00600.x (1999).
- 328 19 Xin, X. F., Kvitko, B. & He, S. Y. *Pseudomonas syringae*: what it takes to be a pathogen. *Nat Rev*  
329 *Microbiol* **16**, 316-328, doi:10.1038/nrmicro.2018.17 (2018).
- 330 20 Toruno, T. Y., Stergiopoulos, I. & Coaker, G. Plant-Pathogen Effectors: Cellular Probes Interfering  
331 with Plant Defenses in Spatial and Temporal Manners. *Annu Rev Phytopathol* **54**, 419-441,  
332 doi:10.1146/annurev-phyto-080615-100204 (2016).
- 333 21 Roux, M. *et al.* The Arabidopsis leucine-rich repeat receptor-like kinases BAK1/SERK3 and  
334 BKK1/SERK4 are required for innate immunity to hemibiotrophic and biotrophic pathogens.  
335 *Plant Cell* **23**, 2440-2455, doi:10.1105/tpc.111.084301 (2011).
- 336 22 Wei, H. L. *et al.* *Pseudomonas syringae* pv. *tomato* DC3000 Type III Secretion Effector  
337 Polymutants Reveal an Interplay between HopAD1 and AvrPtoB. *Cell Host Microbe* **17**, 752-762,  
338 doi:10.1016/j.chom.2015.05.007 (2015).
- 339 23 Tsuda, K. *et al.* Dual regulation of gene expression mediated by extended MAPK activation and  
340 salicylic acid contributes to robust innate immunity in Arabidopsis thaliana. *PLoS Genet* **9**,  
341 e1004015, doi:10.1371/journal.pgen.1004015 (2013).
- 342 24 Qi, J., Wang, J., Gong, Z. & Zhou, J. M. Apoplastic ROS signaling in plant immunity. *Curr Opin*  
343 *Plant Biol* **38**, 92-100, doi:10.1016/j.pbi.2017.04.022 (2017).
- 344 25 McNellis, T. W. *et al.* Glucocorticoid-inducible expression of a bacterial avirulence gene in  
345 transgenic Arabidopsis induces hypersensitive cell death. *Plant J* **14**, 247-257,  
346 doi:10.1046/j.1365-313x.1998.00106.x (1998).
- 347 26 Felix, G., Duran, J. D., Volko, S. & Boller, T. Plants have a sensitive perception system for the  
348 most conserved domain of bacterial flagellin. *Plant J* **18**, 265-276, doi:10.1046/j.1365-  
349 313x.1999.00265.x (1999).
- 350 27 Levine, A., Tenhaken, R., Dixon, R. & Lamb, C. H<sub>2</sub>O<sub>2</sub> from the oxidative burst orchestrates the  
351 plant hypersensitive disease resistance response. *Cell* **79**, 583-593, doi:10.1016/0092-  
352 8674(94)90544-4 (1994).
- 353 28 Chandra, S., Martin, G. B. & Low, P. S. The Pto kinase mediates a signaling pathway leading to  
354 the oxidative burst in tomato. *Proc Natl Acad Sci U S A* **93**, 13393-13397,  
355 doi:10.1073/pnas.93.23.13393 (1996).
- 356 29 Tian, S. *et al.* Plant Aquaporin AtPIP1;4 Links Apoplastic H<sub>2</sub>O<sub>2</sub> Induction to Disease Immunity  
357 Pathways. *Plant Physiol* **171**, 1635-1650, doi:10.1104/pp.15.01237 (2016).

- 358 30 Torres, M. A., Dangl, J. L. & Jones, J. D. Arabidopsis gp91phox homologues AtrbohD and AtrbohF  
359 are required for accumulation of reactive oxygen intermediates in the plant defense response.  
360 *Proc Natl Acad Sci U S A* **99**, 517-522, doi:10.1073/pnas.012452499 (2002).
- 361 31 Daudi, A. *et al.* The apoplastic oxidative burst peroxidase in Arabidopsis is a major component of  
362 pattern-triggered immunity. *Plant cell* **24**, 275-287, doi:10.1105/tpc.111.093039 (2012).
- 363 32 Li, Y. *et al.* Glucose triggers stomatal closure mediated by basal signaling through HXK1 and  
364 PYR/RCAR receptors in Arabidopsis. *J Exp Bot* **69**, 1471-1484, doi:10.1093/jxb/ery024 (2018).
- 365 33 Kadota, Y. *et al.* Direct regulation of the NADPH oxidase RBOHD by the PRR-associated kinase  
366 BIK1 during plant immunity. *Mol Cell* **54**, 43-55, doi:10.1016/j.molcel.2014.02.021 (2014).
- 367 34 Li, L. *et al.* The FLS2-associated kinase BIK1 directly phosphorylates the NADPH oxidase RbohD to  
368 control plant immunity. *Cell Host Microbe* **15**, 329-338, doi:10.1016/j.chom.2014.02.009 (2014).
- 369 35 Dubiella, U. *et al.* Calcium-dependent protein kinase/NADPH oxidase activation circuit is  
370 required for rapid defense signal propagation. *Proc Natl Acad Sci U S A* **110**, 8744-8749,  
371 doi:10.1073/pnas.1221294110 (2013).
- 372 36 Gao, X. *et al.* Bifurcation of Arabidopsis NLR immune signaling via Ca<sup>2+</sup>-dependent protein  
373 kinases. *PLoS pathog* **9**, e1003127, doi:10.1371/journal.ppat.1003127 (2013).
- 374 37 Zhang, M. *et al.* The MAP4 Kinase SIK1 Ensures Robust Extracellular ROS Burst and Antibacterial  
375 Immunity in Plants. *Cell Host Microbe* **24**, 379-391 e375, doi:10.1016/j.chom.2018.08.007  
376 (2018).
- 377 38 Kadota, Y. *et al.* Quantitative phosphoproteomic analysis reveals common regulatory  
378 mechanisms between effector- and PAMP-triggered immunity in plants. *New Phytol* **221**, 2160-  
379 2175, doi:10.1111/nph.15523 (2019).
- 380 39 Asai, T. *et al.* MAP kinase signalling cascade in Arabidopsis innate immunity. *Nature* **415**, 977-  
381 983, doi:10.1038/415977a (2002).
- 382 40 Liang, X. *et al.* Arabidopsis heterotrimeric G proteins regulate immunity by directly coupling to  
383 the FLS2 receptor. *Elife* **5**, e13568, doi:10.7554/eLife.13568 (2016).
- 384 41 Macho, A. P. & Zipfel, C. Targeting of plant pattern recognition receptor-triggered immunity by  
385 bacterial type-III secretion system effectors. *Curr Opin Microbiol* **23**, 14-22,  
386 doi:10.1016/j.mib.2014.10.009 (2015).
- 387 42 Tateda, C. *et al.* Salicylic acid regulates Arabidopsis microbial pattern receptor kinase levels and  
388 signaling. *Plant cell* **26**, 4171-4187, doi:10.1105/tpc.114.131938 (2014).
- 389 43 Sun, T. *et al.* Redundant CAMTA Transcription Factors Negatively Regulate the Biosynthesis of  
390 Salicylic Acid and N-Hydroxypipicolinic Acid by Modulating the Expression of SARD1 and CBP60g.  
391 *Mol Plant* **13**, 144-156, doi:10.1016/j.molp.2019.10.016 (2020).
- 392 44 Kim, Y., Gilmour, S. J., Chao, L., Park, S. & Thomashow, M. F. Arabidopsis CAMTA Transcription  
393 Factors Regulate Pipicolinic Acid Biosynthesis and Priming of Immunity Genes. *Mol Plant* **13**, 157-  
394 168, doi:10.1016/j.molp.2019.11.001 (2020).
- 395 45 Rathinam, V. A. *et al.* TRIF licenses caspase-11-dependent NLRP3 inflammasome activation by  
396 gram-negative bacteria. *Cell* **150**, 606-619, doi:10.1016/j.cell.2012.07.007 (2012).
- 397 46 Baroja-Mazo, A. *et al.* The NLRP3 inflammasome is released as a particulate danger signal that  
398 amplifies the inflammatory response. *Nat Immunol* **15**, 738-748, doi:10.1038/ni.2919 (2014).
- 399 47 Franklin, B. S. *et al.* The adaptor ASC has extracellular and 'prionoid' activities that propagate  
400 inflammation. *Nat Immunol* **15**, 727-737, doi:10.1038/ni.2913 (2014).
- 401 48 Cao, X. Self-regulation and cross-regulation of pattern-recognition receptor signalling in health  
402 and disease. *Nat Rev Immunol* **16**, 35-50, doi:10.1038/nri.2015.8 (2016).
- 403 49 Crabill, E., Joe, A., Block, A., van Rooyen, J. M. & Alfano, J. R. Plant immunity directly or indirectly  
404 restricts the injection of type III effectors by the *Pseudomonas syringae* type III secretion system.  
405 *Plant physiol* **154**, 233-244, doi:10.1104/pp.110.159723 (2010).

406 50 Anderson, J. C. *et al.* Decreased abundance of type III secretion system-inducing signals in  
407 Arabidopsis *mkp1* enhances resistance against *Pseudomonas syringae*. *Proc Natl Acad Sci U S A*  
408 **111**, 6846-6851, doi:10.1073/pnas.1403248111 (2014).  
409 51 Nobori, T. *et al.* Transcriptome landscape of a bacterial pathogen under plant immunity. *Proc*  
410 *Natl Acad Sci U S A* **115**, E3055-E3064, doi:10.1073/pnas.1800529115 (2018).  
411 52 Lee, M. H. *et al.* Lignin-based barrier restricts pathogens to the infection site and confers  
412 resistance in plants. *EMBO J* **38**, e101948, doi:10.15252/embj.2019101948 (2019).  
413 53 Yamada, K., Saijo, Y., Nakagami, H. & Takano, Y. Regulation of sugar transporter activity for  
414 antibacterial defense in Arabidopsis. *Science* **354**, 1427-1430, doi:10.1126/science.aah5692  
415 (2016).  
416  
417

## 418 **Methods**

### 419 **Plant materials and growth conditions**

420 *Arabidopsis thaliana* plants used in this study are in Col-0 ecotype background. The  
421 *fls2/efr/cerk1*<sup>54</sup>, *bak1/bkk1/cerk1*<sup>16</sup>, *rps2*<sup>55</sup>, *rboh*<sup>30</sup>, *bik1*<sup>56</sup>, *cpk5/6/11*<sup>36</sup> mutants were reported  
422 previously. Plants were grown in potting soil in environmentally-controlled growth chambers,  
423 with relative humidity set at 60% and temperature at 22°C with a 12h light/12h dark photoperiod  
424 unless stated otherwise. Four- to five-week-old plants were used for all experiments in this study.  
425 To generate the *bbc/DEX::avrRpt2* and Col-0/*DEX::avrRpt2* transgenic plants, the *avrRpt2* gene  
426 was cloned into pBUD-DEX (pBD) vector in the *XhoI/SpeI* restriction enzyme sites, and the  
427 expression cassette was introduced into Col-0 or *bbc* plants by *Agrobacterium*-mediated  
428 transformation.

### 429 **Bacterial disease and HR assays**

430 The *Pst* DC3000 strains carrying *avrRpt2*, *avrRps4* and *avrPphB* were published previously<sup>57-59</sup>.  
431 The D36E(*avrRpt2*) strain was generated by transforming the *avrRpt2* expression plasmid into  
432 D36E strain by electroporation. For bacterial inoculation, *Pst* strains were cultured in Luria-  
433 Marine (LM) medium overnight at 30°C to a cell density of OD<sub>600</sub>=0.8-1.0. Bacteria were  
434 collected by centrifugation and washed once with sterile water, and adjusted to a cell density of  
435 OD<sub>600</sub>=0.2. For disease assay, bacterial suspension was further diluted to a cell density of  
436 OD<sub>600</sub>=0.001-0.002. Bacteria were infiltrated into leaves with a needleless syringe, and  
437 inoculated plants were kept under ambient humidity for about 1h to allow evaporation of excess  
438 water from the leaf and then covered with a transparent plastic dome to keep high humidity for  
439 disease to develop. For quantification of bacteria, four leaf discs from two different leaves (after  
440 surface sterilization) were taken using a cork borer (7.5mm in diameter) as one biological repeat,  
441 and 3-4 repeats were taken for each treatment. Leaf discs were ground and diluted in sterile  
442 water, and the extraction solutions were then plated on LM agar plates supplemented with  
443 rifampicin (at 50mg/L). Colonies were counted with a stereoscope 24h after incubation at 30°C.  
444 For HR assay, *Pst* DC3000(*avrRpt2*) suspension was prepared as described above and bacterial  
445 suspension at the cell density of OD<sub>600</sub>=0.2 was syringe-infiltrated into leaves. Plants were then  
446 kept under ambient humidity for about 7h before tissue collapse was recorded.

### 447 **RIN4 cleavage assays**

448 Arabidopsis plant leaves were infiltrated with *Pst* D36E(*avrRpt2*) (at OD<sub>600</sub>=0.1), and samples  
449 were collected at 0, 2, 4, 8h after infiltration by snap-freezing in liquid nitrogen. Three leaves  
450 were collected as one biological repeat. Total proteins were extracted in protein extraction buffer  
451 (50mM Tris-HCl pH 7.5, 150mM NaCl, 5mM EDTA pH 7.5, 1mM DTT, 1% Triton X-100,  
452 1mM Phenylmethylsulfonyl fluoride) supplemented with 1 x plant protease inhibitor cocktail  
453 (Complete EDTA-free, Roche). Cell lysates were centrifuged at 12,000 x g for 15min at 4°C, and  
454 the pellet was discarded. Protein concentration of the supernatant (“total protein extract”) was  
455 determined by Bradford protein assay kit (Bio-Rad). An equal amount of total protein was  
456 loaded on 12% SDS acrylamide gels (Bio-Rad) for SDS-PAGE. RIN4 protein was detected by  
457 anti-RIN4 antibody at a dilution of 1:1000<sup>60</sup>. Total proteins were stained by Coomassie Brilliant  
458 Blue (CBB) to show equal loading.

#### 459 **MAPK kinase activity assay**

460 Four-week-old plant leaves were infiltrated with *Pst* D36E(*avrRpt2*) (at OD<sub>600</sub>=0.02), and leaves  
461 were collected at different time points by snap-freezing in liquid nitrogen. Proteins were  
462 extracted in protein extraction buffer (50mM Tris-HCl pH 7.5, 150mM NaCl, 5mM EDTA pH  
463 7.5, 1mM DTT, 1% Triton X-100, 1mM Phenylmethylsulfonyl fluoride) supplemented with 1 x  
464 plant protease inhibitor cocktail (Complete EDTA-free, Roche) and 1 x phosphatase inhibitor  
465 cocktail (PhosSTOP, Roche). Total protein concentration was determined with Bradford protein  
466 assay kit (Bio-Rad). An equal amount of protein was loaded onto 12% SDS-PAGE gel for  
467 western blot. Phosphorylated MPK3 and MPK6 proteins were detected by anti-Phospho-p44/42  
468 antibody (Cell Signaling Technology).

#### 469 **Protein extraction and immunoblotting for PTI signaling components**

470 Four-week-old plant leaves were infiltrated with sterile water (mock) or different *Pst* strains at  
471 OD<sub>600</sub>=0.02, and samples were collected at 0.5, 3, 6, 8h after infiltration. Three to four leaves  
472 from different plants were collected as one sample. Protein was extracted using Plasma  
473 Membrane Protein Isolation Kit (Invent) according to the manufacturer’s protocol. Concentration  
474 of the cytosolic protein was determined with Bradford protein assay kit (Bio-Rad). An equal  
475 amount of protein was loaded onto SDS-PAGE gel for western blot. Different PTI components  
476 were detected by following antibodies with indicated dilution: anti-RBOHD (Agrisera), 1:1000;

477 anti-BAK1 (Agrisera), 1:5000; anti-BIK1 (Agrisera), 1:3000; anti-MPK3 (Sigma-Aldrich),  
478 1:2500; anti-MPK6 (Sigma-Aldrich), 1:5000.

#### 479 **Protoplast transformation and detection of RBOHD phosphorylation**

480 Protoplasts were prepared from Col-0/*DEX::avrRpt2* and *bbc/DEX::avrRpt2* plants (4-5 weeks  
481 old; grown under 10h light/14h dark photoperiod) and transfected with FLAG-RBOHD plasmid.  
482 After overnight incubation to allow protein accumulation, protoplasts were treated with 100nM  
483 flg22, 5 $\mu$ M DEX or 100nM flg22+5 $\mu$ M DEX and incubated for 2.5h. Total protein was extracted  
484 with protein extraction buffer (50 mM HEPES [pH 7.5], 150 mM KCl, 1 mM EDTA, 0.5%  
485 Triton-X100, 1 mM DTT, protease inhibitor cocktail), and then incubated with 50 $\mu$ L anti-FLAG  
486 M2 agarose beads (Sigma-Aldrich) for 2 h at 4°C. The bound protein was eluted with 50 $\mu$ L of  
487 0.5mg/mL 3xFLAG peptide for 30 min. RBOHD phosphorylation was detected by  
488 immunoblotting with RBOHD-pS343/347 antibody published previously<sup>34</sup>.

#### 489 **ROS detection Assays**

490 ROS measurement with luminol-based approach was performed as previously described with  
491 minor modification<sup>33</sup>. Briefly, leaf discs of four-week-old *Arabidopsis* plants were harvested  
492 using a cork borer (5.5mm in diameter) and floated on 200 $\mu$ L sterile water in a 96-well plate, and  
493 then incubated overnight at room temperature under continuous light. On the next day, water was  
494 replaced with a solution containing 30mg/L (w/v) luminol (Sigma-Aldrich) and 20mg/L (w/v)  
495 peroxidase from horseradish (Sigma-Aldrich) with 100nM flg22 only, 5 $\mu$ M DEX only or 100nM  
496 flg22+5 $\mu$ M DEX. The luminescence was detected for 5-6h with a signal integration time of 2min  
497 using Varioskan Flash plate reader (Thermo Fisher Scientific). For determining the effects of  
498 chemical inhibitors, 10 $\mu$ M diphenyleneiodonium (DPI; Sigma-Aldrich), 15 $\mu$ M  
499 salicylhydroxamic acid (SHAM; Sigma-Aldrich) or 1 $\mu$ M sodium azide was added to the  
500 elicitation solution at indicated time points and luminescence was recorded as described above.

501

502 For detection of ROS production by 2',7'-Dichlorofluorescein diacetate (H<sub>2</sub>DCFDA) under  
503 confocal microscopy, plants were infiltrated with *Pst* D36E (OD<sub>600</sub>=0.02) or D36E(*avrRpt2*)  
504 (OD<sub>600</sub>=0.02), air-dried and put back into the plant growth room. ROS was detected at 4-5h post  
505 infiltration. Ten  $\mu$ M of H<sub>2</sub>DCFDA solution was infiltrated into the leaf and fluorescence signal



506 was detected 10 min later. Images were captured using a Leica SP8 microscope with a 488nm  
507 excitation and 501-550nm emission, and chlorophyll auto-fluorescence was detected at 640-  
508 735nm.

### 509 **RNA extraction and qRT-PCR analysis of gene expression**

510 To analyze gene expression levels, four-week-old *Arabidopsis* plant leaves were infiltrated with  
511 sterile water (mock) or different *Pst* strains at OD<sub>600</sub>=0.04, and then harvested at indicated time  
512 points. Three leaves from different plants were collected as one biological replicate and 4  
513 replicates were collected for each treatment. Samples were frozen and ground in liquid nitrogen.  
514 Total mRNA was extracted using Trizol reagent (Invitrogen) according to the manufacturer's  
515 protocol. One µg of RNA was used for reverse transcription using the ReverTra Ace® qPCR RT  
516 Master Mix with gDNA remover (TOYOBO). Real-time qPCR analysis was carried out with the  
517 SYBR®Green Realtime PCR Master Mix (TOYOBO) on a CFX real-time machine (Bio-Rad).  
518 Two technical repeats were performed for each sample. The plant *U-box* gene was used as  
519 reference gene for normalization. Primer sequences for qPCR are listed in Supplementary Table  
520 2.

### 521 **cDNA library generation and RNAseq**

522 For RNAseq experiments, bacterial inoculation and sample collection were performed as  
523 described above. Two leaves from different plants were harvested as one replicate, and four  
524 biological replicates were collected for each treatment/time point. Total mRNA was extracted  
525 using Trizol reagent (Invitrogen). Total RNA was then treated with DNase I (Invitrogen) to  
526 remove DNA and purified RNA was recovered with RNeasy® MinElute™ Cleanup kit  
527 (QIAGEN) according to the manufacturer's instructions. Library construction and RNA  
528 sequencing were performed by Novogene company. Briefly, RNA purity and integrity was  
529 examined using the NanoPhotometer® spectrophotometer (IMPLEN) and the RNA Nano 6000  
530 Assay Kit of the Bioanalyzer 2100 system (Agilent Technologies). RNA concentration was  
531 measured with Qubit® RNA Assay Kit in Qubit® 2.0 Fluorometer (Life Technologies). One µg  
532 RNA per sample was used as input material for library preparation and sequencing. Sequencing  
533 libraries were generated using NEBNext® Ultra™ RNA Library Prep Kit for Illumina® (NEB),  
534 following the manufacturer's recommendations and sequenced on Illumina HiSeq platform and  
535 150 bp paired-end reads were generated.

## 536 **Data analysis of RNA-seq**

537 Clean raw data were obtained by removing reads containing adapter sequences or ploy-N and  
538 low-quality reads and were then mapped to the Arabidopsis genome (TAIR10). Gene expression  
539 levels were calculated using the TPM method (Transcripts per Kb of exon model per Million  
540 mapped reads). Differential expression analysis was performed using the DESeq R package  
541 (1.18.0). The resulting P-values were adjusted using the Benjamini and Hochberg's approach for  
542 controlling the false discovery rate. Genes with an q-value < 0.05 and log<sub>2</sub>(Fold change) > 1  
543 found by DESeq were assigned as differentially expressed.

## 544 **Statistical analysis**

545 All statistical analyses were performed by one-way or two-way analysis of variance (ANOVA)  
546 with GraphPad software or by two sided student's *t*-test with Office Excel software. Each  
547 experiment was repeated at least three times and data were represented as the mean ± standard  
548 error of mean (s.e.m.) or standard deviation (s.d.) as indicated.

## 549 **Data availability**

550 All data is available in the main text or the supplementary materials.

551

## 552 **References**

- 553 54 Gimenez-Ibanez, S., Ntoukakis, V. & Rathjen, J. P. The LysM receptor kinase CERK1 mediates  
554 bacterial perception in Arabidopsis. *Plant Signal Behav* **4**, 539-541, doi:10.4161/psb.4.6.8697  
555 (2009).
- 556 55 Mindrinos, M., Katagiri, F., Yu, G. L. & Ausubel, F. M. The *A. thaliana* disease resistance gene  
557 RPS2 encodes a protein containing a nucleotide-binding site and leucine-rich repeats. *Cell* **78**,  
558 1089-1099, doi:10.1016/0092-8674(94)90282-8 (1994).
- 559 56 Veronese, P. *et al.* The membrane-anchored BOTRYTIS-INDUCED KINASE1 plays distinct roles in  
560 Arabidopsis resistance to necrotrophic and biotrophic pathogens. *Plant cell* **18**, 257-273,  
561 doi:10.1105/tpc.105.035576 (2006).
- 562 57 Mudgett, M. B. & Staskawicz, B. J. Characterization of the *Pseudomonas syringae pv. tomato*  
563 AvrRpt2 protein: demonstration of secretion and processing during bacterial pathogenesis. *Mol*  
564 *Microbiol* **32**, 927-941, doi:10.1046/j.1365-2958.1999.01403.x (1999).
- 565 58 Hinsch, M. & Staskawicz, B. Identification of a new Arabidopsis disease resistance locus, *RPs4*,  
566 and cloning of the corresponding avirulence gene, *avrRps4*, from *Pseudomonas syringae pv. pisi*.  
567 *Mol Plant Microbe Interact* **9**, 55-61, doi:10.1094/mpmi-9-0055 (1996).
- 568 59 Aarts, N. *et al.* Different requirements for EDS1 and NDR1 by disease resistance genes define at  
569 least two R gene-mediated signaling pathways in Arabidopsis. *Proc Natl Acad Sci U S A* **95**,  
570 10306-10311, doi:10.1073/pnas.95.17.10306 (1998).

- 571 60 Lee, D., Bourdais, G., Yu, G., Robatzek, S. & Coaker, G. Phosphorylation of the Plant Immune  
572 Regulator RPM1-INTERACTING PROTEIN4 Enhances Plant Plasma Membrane H<sup>+</sup>-ATPase Activity  
573 and Inhibits Flagellin-Triggered Immune Responses in Arabidopsis. *Plant cell* **27**, 2042-2056,  
574 doi:10.1105/tpc.114.132308 (2015).
- 575 61 Pajerowska-Mukhtar, K. M. *et al.* The HSF-like transcription factor TBF1 is a major molecular  
576 switch for plant growth-to-defense transition. *Curr Biol* **22**, 103-112,  
577 doi:10.1016/j.cub.2011.12.015 (2012).
- 578 62 Hickman, R. *et al.* Architecture and Dynamics of the Jasmonic Acid Gene Regulatory Network.  
579 *Plant cell* **29**, 2086-2105, doi:10.1105/tpc.16.00958 (2017).
- 580 63 Nemhauser, J. L., Hong, F. & Chory, J. Different plant hormones regulate similar processes  
581 through largely nonoverlapping transcriptional responses. *Cell* **126**, 467-475,  
582 doi:10.1016/j.cell.2006.05.050 (2006).
- 583 64 Hartmann, M. *et al.* Flavin Monooxygenase-Generated N-Hydroxypipicolinic Acid Is a Critical  
584 Element of Plant Systemic Immunity. *Cell* **173**, 456-469 e416, doi:10.1016/j.cell.2018.02.049  
585 (2018).

586

## 587 **Acknowledgments**

588 We would like to thank Xin lab members for helpful discussions. We thank the Greenhouse and  
589 Confocal Microscopy Imaging facilities at CAS Center for Excellence in Molecular Plant  
590 Sciences for plant growth and technical support. Dr. Gitta Coaker from University of California,  
591 Davis, USA kindly provided RIN4 antibody. We thank Bruno Pok Man Ngou and Pingtao Ding  
592 from Jonathan Jones' lab at the Sainsbury Laboratory, UK, for insightful discussions during  
593 manuscript preparation. This research was supported by Chinese Academy of Sciences, Center  
594 for Excellence in Molecular Plant Sciences/Institute of Plant Physiology and Ecology, National  
595 Key Laboratory of Molecular Plant Genetics and Chinese Academy of Sciences Strategic  
596 Priority Research Program (Type-B; Project number: XDB27040211). Guozhi Bi was supported  
597 by the Youth Program of National Natural Science Foundation of China (NSFC) (Project  
598 number: 31900222).

## 599 **Author contributions**

600 With initial observation of PRR dependency for ETI resistance made by X-F. X. while at  
601 Michigan State University, supported by the US National Institute of General Medical Sciences  
602 (GM109928), M. Y. and X-F. X. designed subsequent experiments at CAS Center for Excellence  
603 in Molecular Plant Sciences/Institute of Plant Physiology and Ecology; M. Y., Z. J., G. B., K. N.  
604 and M. L. performed all the experiments described; M. Y. and X-F. X. wrote the paper and S. Y.  
605 H. and J-M. Z. edited the paper.

606 **Competing interests**

607 The authors declare no competing interests.

608 **Materials & correspondence**

609 Correspondence and material requests should be addressed to [xinxf@sippe.ac.cn](mailto:xinxf@sippe.ac.cn).

610

611 **Supplementary Table 2. Primers used in this study**

| <b>Primer name</b> | <b>Sequences (5'-3')</b>      | <b>Purpose</b>     |
|--------------------|-------------------------------|--------------------|
| FRK1 qRT-FP        | ATCTTCGCTTGGAGCTTCTC          | <b>For RT-qPCR</b> |
| FRK1 qRT-RP        | TGCAGCGCAAGGACTAGAG           |                    |
| WRKY29 qRT-FP      | CTCCATACCCAAGGAGTTATTACAG     |                    |
| WRKY29 qRT-RP      | CGGGTTGGTAGTTCATGATTG         |                    |
| U-box qRT-FP       | TGCGCTGCCAGATAATACTACTATT     |                    |
| U-box qRT-RP       | TGCTGCCCAACATCAGGTT           |                    |
| RPS2 qp-FP         | GTGAGTAAATGTGGAGGATTGC        |                    |
| RPS2 qp-RP         | GTAGCTGAATTTCAAAGGGCA         |                    |
| RbohD qRT-FP       | GATCAAGGTGGCTGTTTACCC         |                    |
| RbohD qRT-RP       | TCGGCAGTTCACCAACATGA          |                    |
| BAK1 qRT-FP        | AGGTGTTCTCTTGGAGACTAGGA       |                    |
| BAK1 qRT-RP        | AGAGATCCAGAACTTGTAGCGT        |                    |
| BIK1 qRT-FP        | TTCTTCACAGCGATCCCGTC          |                    |
| BIK1 qRT-RP        | TTGCGTTGTAGTCCGCATCA          |                    |
| XLG2 qRT-FP        | AGTCTTCAGGCAATGTGGGAG         |                    |
| XLG2 qRT-RP        | CTCACGGCTTGATGGTGGAA          |                    |
| MKK4 qRT-FP        | CTTATCTCCATAGCCGTCACAT        |                    |
| MKK4 qRT-RP        | GAGCCAAGATCCTACTAACTCC        |                    |
| MKK5 qRT-FP        | CGCCGCTAAAAGCTTATCC           |                    |
| MKK5 qRT-RP        | CGTCTCACGGTATCTTCGTG          |                    |
| MAPK3 qRT-FP       | CCAAGAAGCCATAGCACTCA          |                    |
| MAPK3 qRT-RP       | AGCCATTCGGATGGTTATTG          |                    |
| AvrRpt2 qRT-FP     | CTTTTCACGATCCCCGACAGGG        |                    |
| AvrRpt2 qRT-RP     | GCGGTAGAGCATTGCGTGTGG         |                    |
| pBD-AvrRpt2-F      | CCGCTCGAGATGAAAATTGCTCCAGTTGC | <b>For Cloning</b> |
| pBD-AvrRpt2-R      | CGGACTAGTTTAGCGGTAGAGCATTGCGT |                    |

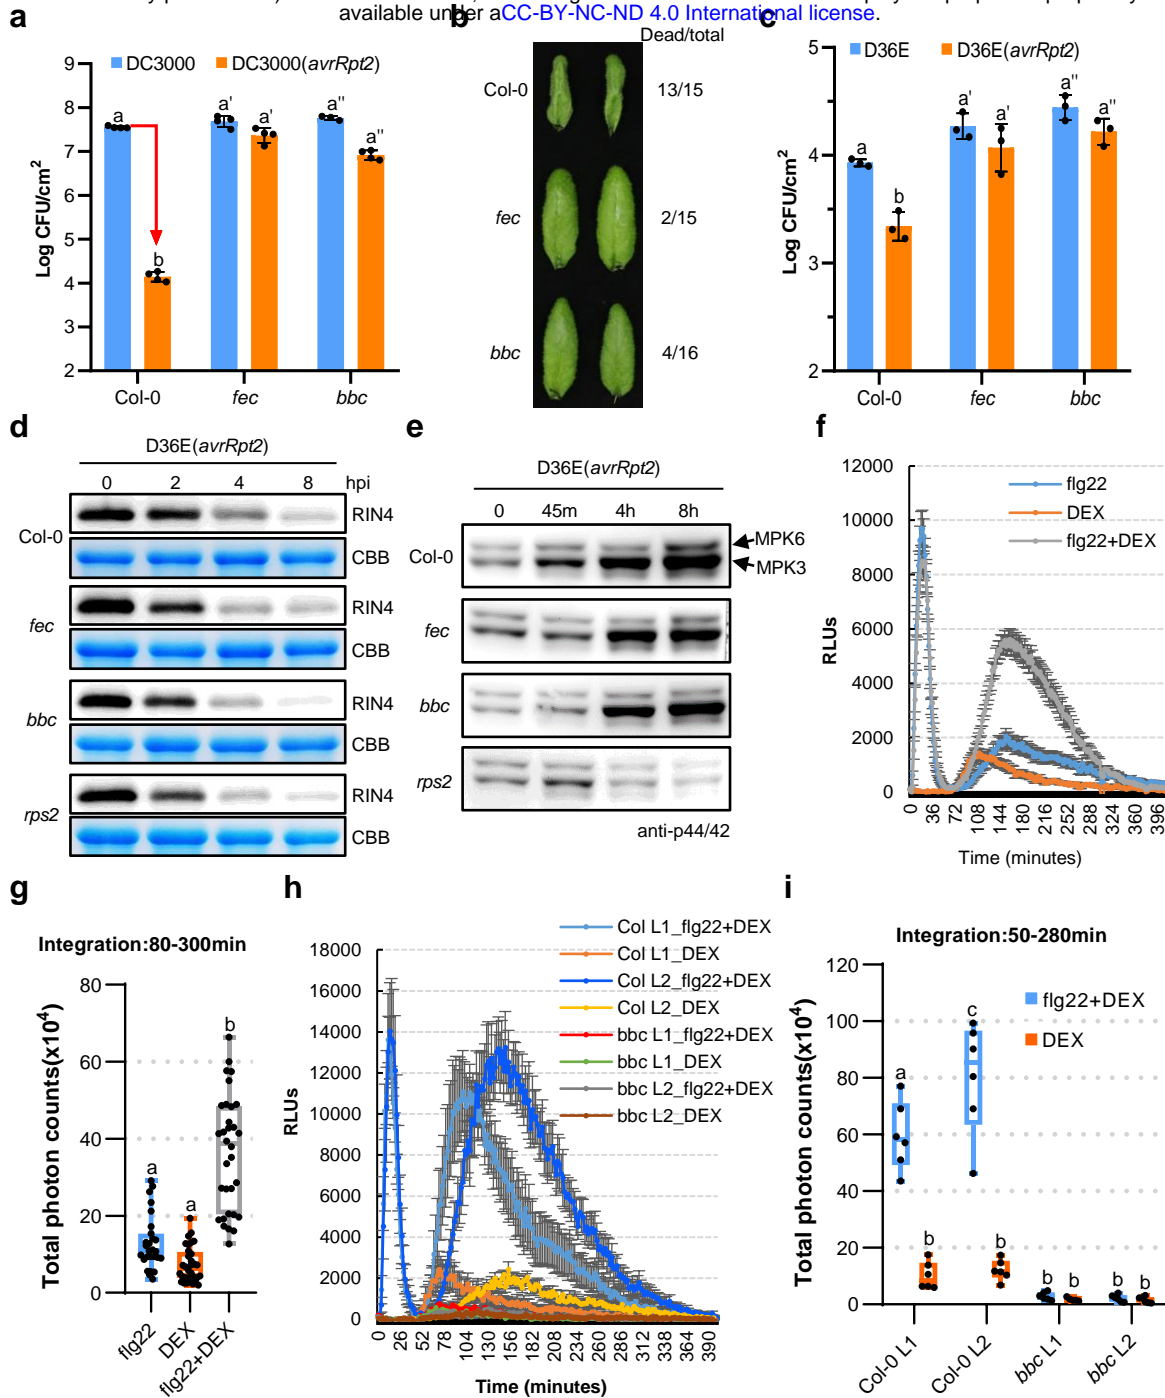

**Fig. 1** | See next page for caption.

**Fig.1| PTI-associated PRR/co-receptors are required for ETI responses and resistance. a,**

Two independent triple PRR/co-receptor mutant plants were hyper-susceptible to *Pst* DC3000 (*avrRpt2*) infection. Bacteria were infiltrated into Arabidopsis leaves at  $OD_{600}=0.002$  and bacterial populations inside leaves were determined 3 days post infection. **b**, HR cell death (indicated by leaf collapse in Col-0) was compromised in PRR/co-receptor mutants. *Pst* DC3000 (*avrRpt2*) bacteria were infiltrated into Arabidopsis leaves at  $OD_{600}=0.2$  and pictures were taken ~7 h after infiltration. Numbers of dead and total infiltrated leaves were counted. **c**, The triple PRR/co-receptor mutant plants were hyper-susceptible to D36E(*avrRpt2*) infection. Bacteria were infiltrated into Arabidopsis leaves at  $OD_{600}=0.004$  and bacterial populations inside leaves were determined 4 days post infection. Different letters in **a**, and **c**, indicate statistically significant differences in bacterial population, as determined by two-way ANOVA (mean  $\pm$  s.d.;  $n \geq 3$ ;  $p < 0.05$ ). **d**, **e**, RIN4 cleavage **d** and MPK3/6 phosphorylation **e** in Col-0 and the PRR/co-receptor mutants after D36E(*avrRpt2*) inoculation. CBB, Coomassie Brilliant Blue staining. An equal amount of total protein was loaded in each lane. **f**, **g**, ROS burst detected by luminol-HRP approach in the DEX-inducible *avrRpt2* transgenic plant after treatment of 100nM flg22, 5 $\mu$ M DEX, or both. RLUs, relative luminescence units. Total photon counts are calculated from **f** ( $n \geq 27$ ). Different letters indicate statistically significant differences as analyzed by one-way ANOVA ( $p < 0.05$ ). **h**, **i**, ROS burst in Col-0/*DEX::avrRpt2* and *bbc/DEX::avrRpt2* plants after treatment of 5 $\mu$ M DEX, or 100nM flg22+5 $\mu$ M DEX. Total photon counts are calculated from **h** ( $n \geq 5$ ). Different letters indicate statistically significant differences as analyzed by two-way ANOVA ( $p < 0.05$ ). Box plots: centre line, median; box limits, lower and upper quartiles; whiskers, highest and lowest data points. Dots indicate individual data points. All experiments were repeated at least three times with similar trends.

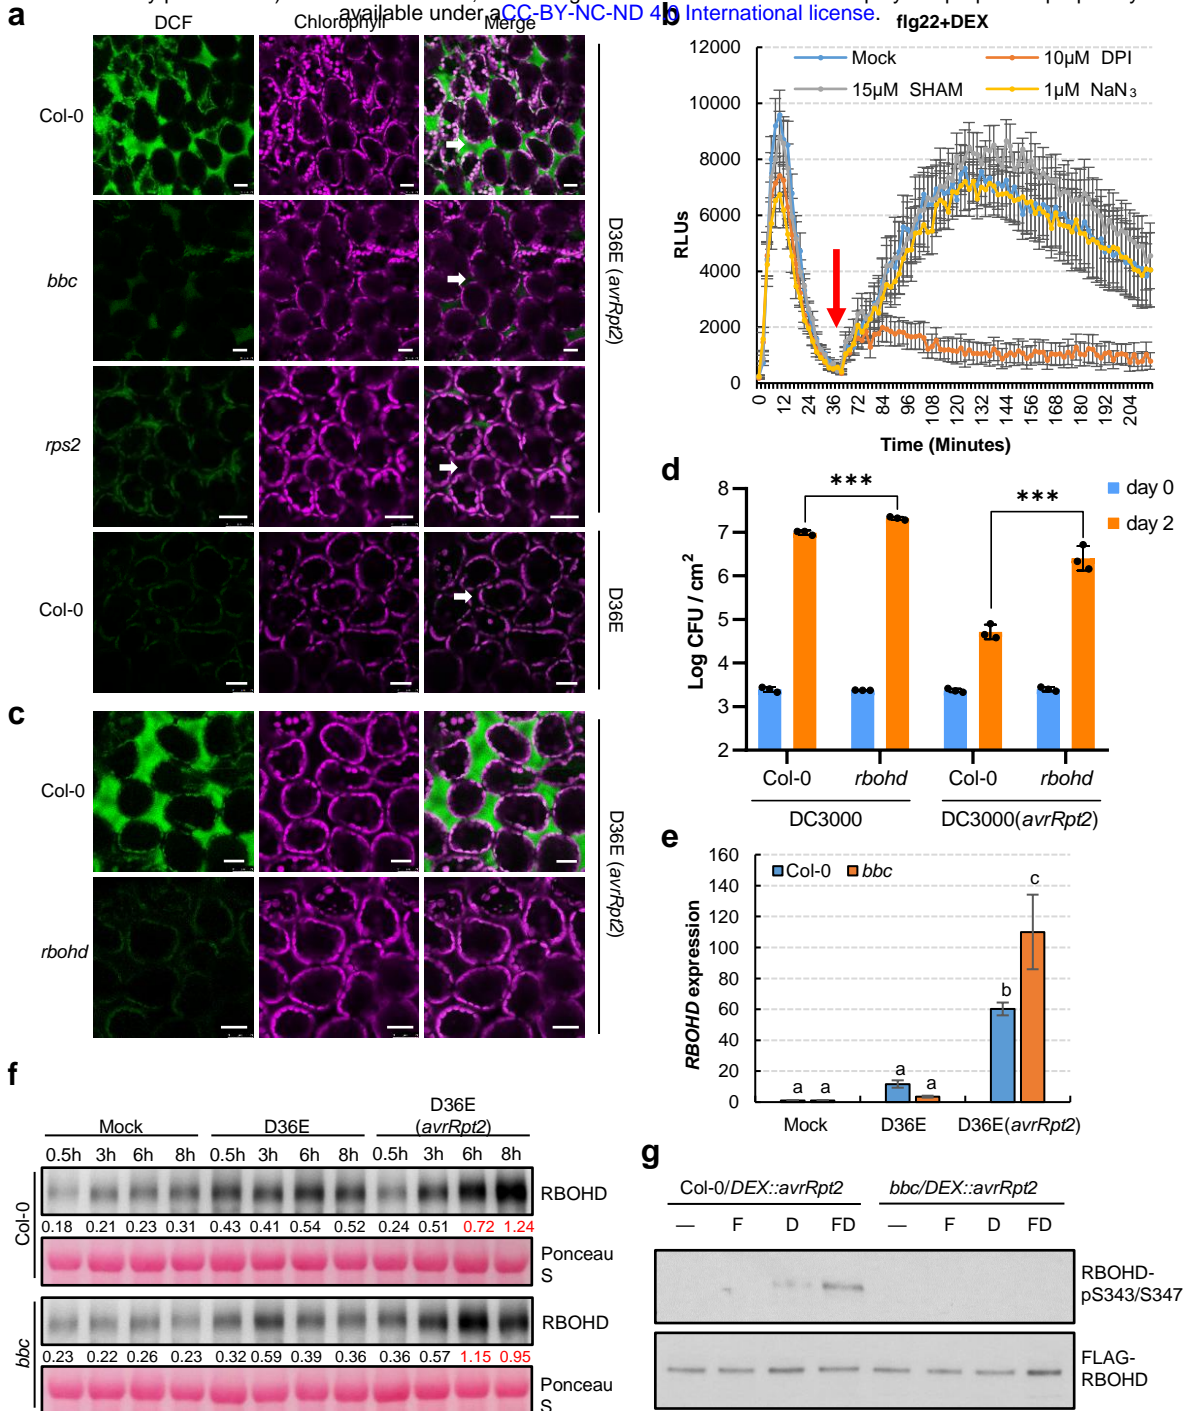

**Fig. 2** | See next page for caption.



**Fig.2| AvrRpt2-triggered ROS is mediated by RBOHD and requires PRR/co-receptors for activation.** **a**, ROS burst detected with fluorescent dye H<sub>2</sub>DCFDA in Col-0, *bbc*, *rps2* and *rboh*d leaves 5h after infiltration of D36E(*avrRpt2*) or in Col-0 leaves 5h after infiltration of D36E strain. White arrows indicate the apoplast space in the leaf. Scale bars = 25μm. **b**, ETI-associated ROS burst is inhibited by DPI, an NADPH oxidase inhibitor. ROS was detected in Col-0/*DEX::avrRpt2* plants after treatment of 100nM flg22 and 5μM DEX. Chemical inhibitors (DPI, SHAM or NaN<sub>3</sub>) were added after the first ROS burst (about 40min after addition of flg22 and DEX). Data are displayed as mean ± s.e.m. ( $n \geq 6$ ). **c**, ROS burst detected with fluorescent dye H<sub>2</sub>DCFDA in Col-0 and *rboh*d leaves 5h after infiltration of D36E(*avrRpt2*). Scale bars = 25μm. **d**, The *rboh*d mutant plant is compromised in ETI resistance against *Pst* DC3000 (*avrRpt2*). Bacteria were infiltrated into Arabidopsis leaves at OD<sub>600</sub>=0.001 and bacterial populations inside leaves were determined 2 days post infection. \*\*\*, student's *t*-test, two-tailed,  $p < 0.001$ . Data are displayed as mean ± s.d. ( $n = 3$ ). **e**, RBOHD transcript levels in Col-0 and *bbc* plants 3h after inoculation of bacterial strains indicated. Data are displayed by mean ± s.e.m. ( $n \geq 3$ ). Different letters indicate statistically significant differences, as analyzed by two-way ANOVA ( $p < 0.05$ ). **f**, RBOHD protein levels in Col-0 and *bbc* plants at different time points after inoculation of bacterial strains indicated. The numbers indicate band intensity relative to that of Ponceau S, quantified by ImageJ, and red indicates strong induction. **g**, Phosphorylation of RBOHD protein at S343/S347 sites requires PRR/co-receptors. FLAG-RBOHD was transformed into protoplasts prepared from Col-0/*DEX::avrRpt2* and *bbc/DEX::avrRpt2* plants. Protoplasts were treated with elicitors (—, Mock; F, 100nM flg22; D, 5μM DEX; FD, 100nM flg22+5μM DEX) and harvested 2.5h later for FLAG-RBOHD immunoprecipitation. Phosphorylated and total RBOHD proteins were detected by RBOHD pS343/347-specific antibody and FLAG antibody, respectively. All experiments were repeated at least three times with similar trends.

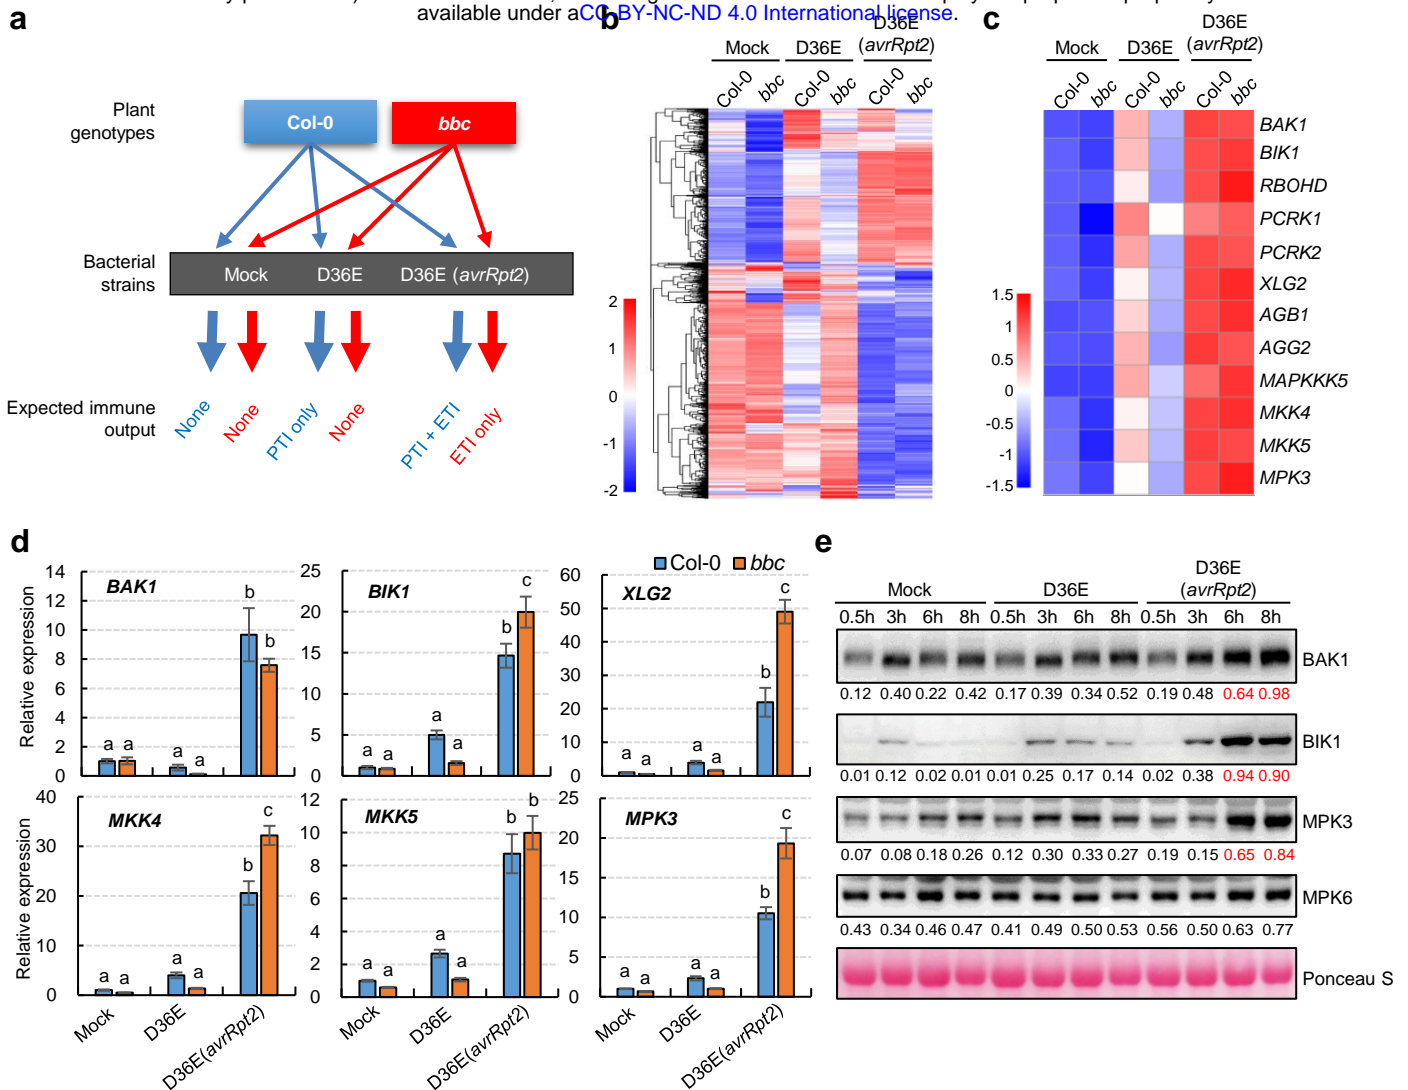

**Fig.3| ETI upregulates key components of the PTI pathway. a**, A diagram showing the RNAseq design in this study. **b**, A heat-map of the expression pattern of D36E/PTI-responsive genes in the RNAseq experiment. **c**, A heat map of the expression pattern of PTI pathway genes, showing restoration and up-regulation of expression of major PTI components during AvrRpt2-triggered ETI. **d**, qRT-PCR results of representative PTI pathway genes. Col-0 and *bbc* plants were infiltrated with different strains indicated, and leaves were harvested 3h post infiltration for transcript analysis (mean  $\pm$  s.e.m;  $n \geq 3$ ). Different letters indicate statistically significant differences as analyzed by two-way ANOVA ( $p < 0.05$ ). **e**, Protein levels of BAK1, BIK1, MPK3 and MPK6 in Col-0 plants at different time points after inoculation of bacterial strains indicated. BAK1 is detected in the immunoblot of total membrane fraction and other proteins are detected in the immunoblot of total protein extracts. Equal amounts of total proteins were loaded into gel lanes. MPK6 protein is not induced by ETI and serves as an internal control. The numbers indicate band intensity relative to that of Ponceau S, quantified by ImageJ, and red indicates strong induction. All experiments were repeated at least three times with similar trends.

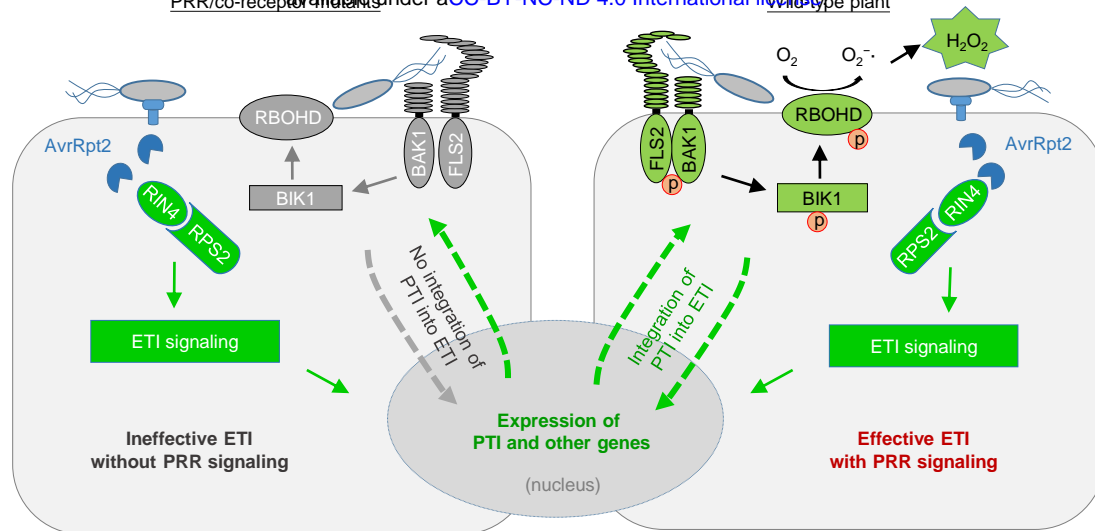

**Fig.4| A model depicting findings from this study showing PTI as a key component of ETI.**

Grey color indicates mutated (i.e. FLS2 and BAK1) or inactive (i.e. RBOHD and BIK1) proteins.

In wild-type plant, PTI is integrated into ETI in that RPS2 activation leads to protein accumulation of PTI components such as RBOHD, and PRR/co-receptors are required for fully “activating” it by phosphorylation. In the absence of PRR/co-receptors (left panel), although NLR activation strongly induces protein accumulation of PTI components, many of these components, such as BIK1 and RBOHD, are inactive (shown by the grey arrows), leading to compromised ETI resistance.

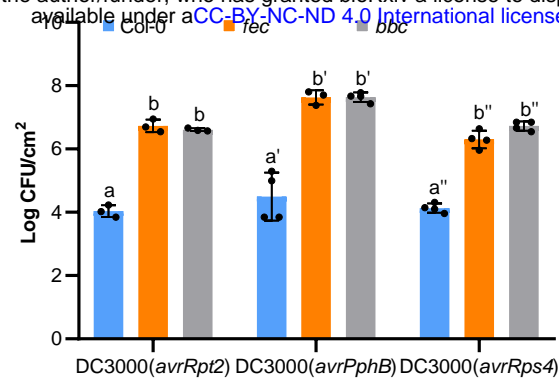

**Extended Data Fig.1| PRR/co-receptors are required for ETI elicited by different *P. syringae* avirulent effectors.** AvrPphB- and AvrRps4-mediated ETI are also compromised in *fec* and *bbc* mutants. Plants were infiltrated with different strains at OD<sub>600</sub>=0.002. Bacterial populations were determined 3 days post inoculation. Different letters indicate statistically significant differences in bacterial populations as determined by two-way ANOVA. (mean ± s.d.;  $n \geq 3$ ;  $p < 0.05$ ). Experiments were repeated at least three times with similar trends.

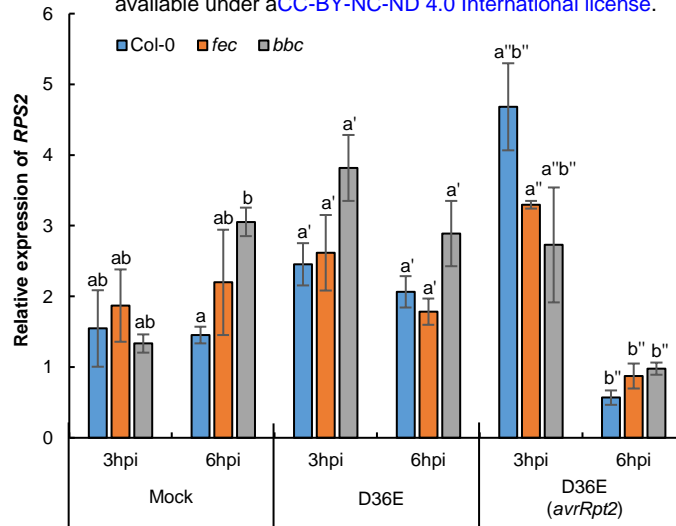

**Extended Data Fig.2| The transcript levels of *RPS2* are not altered in the *fec* and *bbc* mutant plants.** *RPS2* transcript levels in the *fec* and *bbc* mutant plants were similar to those in Col-0 plants after inoculation of bacterial strains indicated. Different letters indicate statistically significant differences as analyzed by two-way ANOVA (mean  $\pm$  s.e.m;  $n = 3$ ;  $p < 0.05$ ). Experiments were repeated at least three times with similar trends.

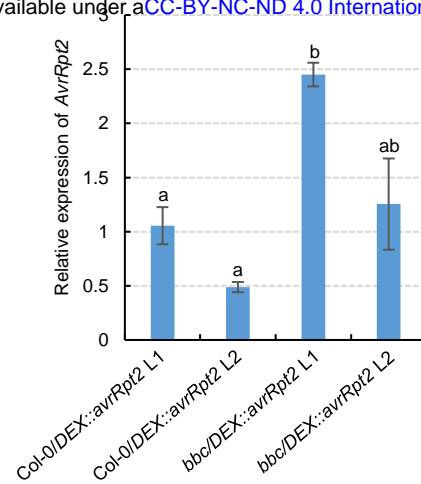

**Extended Data Fig.3| Characterization of different lines of *bbc/DEX::avrRpt2* plants.**

Expression levels of the *avrRpt2* transgene in different transgenic lines 2h after infiltration with 5µM DEX. Different letters indicate statistically significant differences as analyzed by one-way ANOVA (mean  $\pm$  s.e.m.;  $n \geq 3$ ;  $p < 0.05$ ). Experiments were repeated at least three times with similar trends.

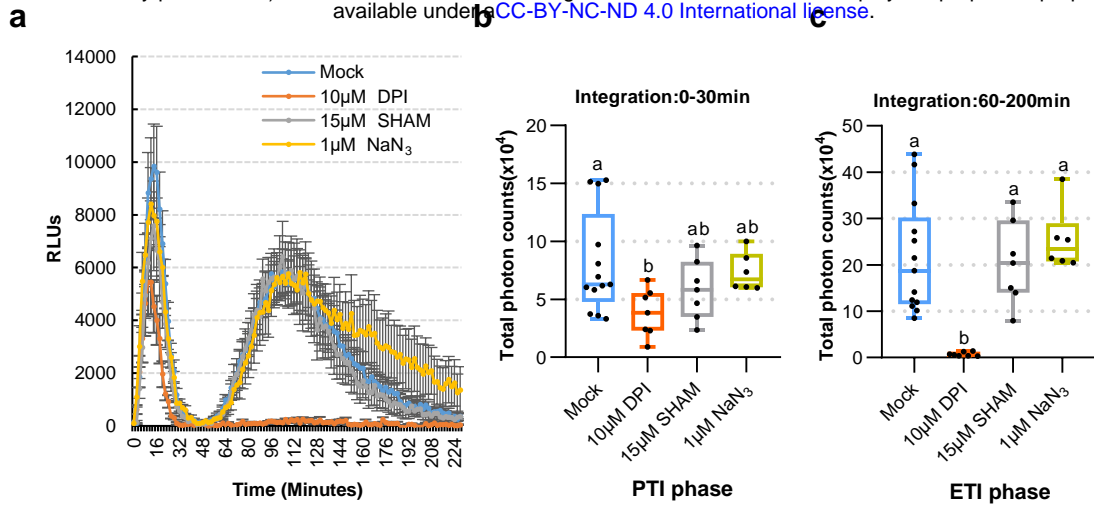

**Extended Data Fig.4| AvrRpt2-triggered ETI-ROS depends on NADPH oxidase. a-c,** ROS production in *Col-0/DEX::avrRpt2* L1 plants was inhibited by NADPH oxidase inhibitor DPI. Leaf discs were treated with 100nM flg22 and 5µM DEX. DPI, SHAM and NaN<sub>3</sub> were added at the beginning of measurement (mean ± s.e.m.;  $n \geq 6$ ). **b-c,** Total photon counts are calculated from **a** at the PTI phase (0-30min) or ETI phase (60-200min). Different letters indicate statistically significant difference as analyzed by one-way ANOVA ( $p < 0.05$ ). Box plots: centre line, median; box limits, lower and upper quartiles; dots, individual data points; whiskers, highest and lowest data points. Experiments were repeated at least three times with similar trends.

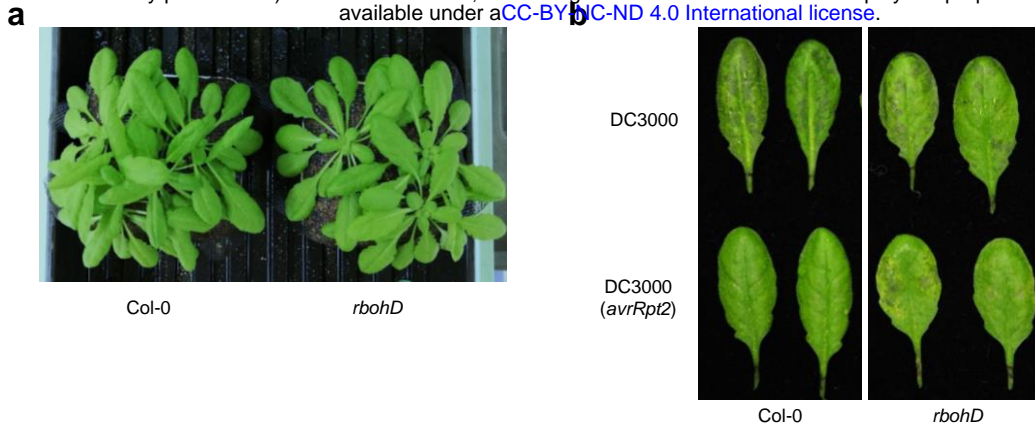

**Extended Data Fig.5| The *rbohD* mutant plant is compromised in ETI resistance against *Pst* DC3000(*avrRpt2*).** **a**, Appearance of the 5 week-old *rbohD* mutant plants before bacteria inoculation. **b**, Disease symptom of Col-0 and *rbohD* mutant plant 2 days after *Pst* DC3000 and *Pst* DC3000 (*avrRpt2*) infiltration. Experiments were repeated at least three times with similar trends.



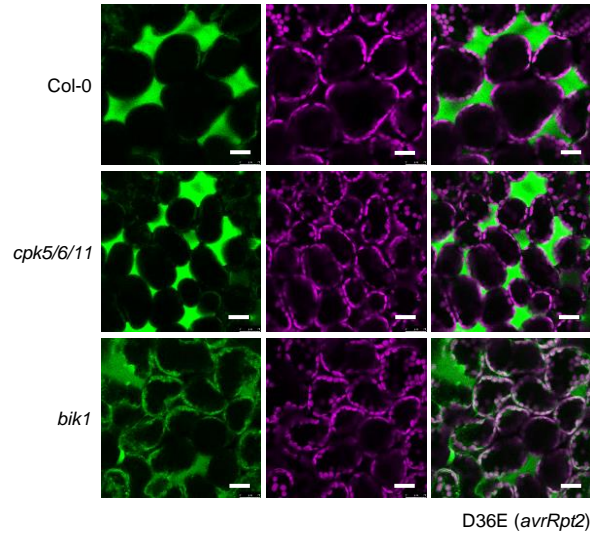

**Extended Data Fig.6| The AvrRpt2 ETI-associated ROS burst is partially mediated by BIK1.** ROS was detected in the *bik1* and *cpk5/6/11* mutant plants by H<sub>2</sub>DCFDA dye 4.5 h after D36E (*avrRpt2*) inoculation. Scale bars = 25  $\mu$ m. Experiments were repeated at least three times with similar trends.

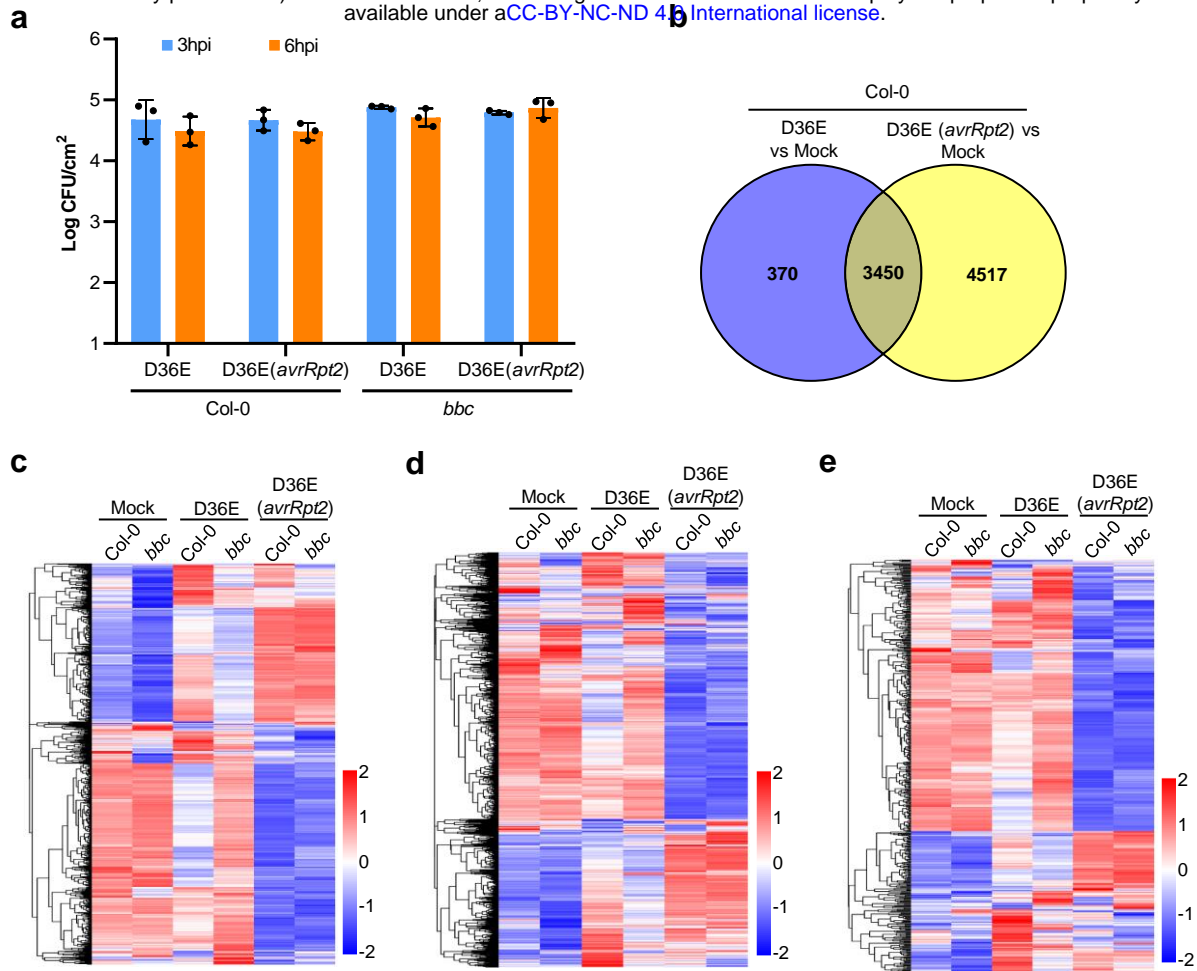

**Extended Data Fig.7| Transcriptomic analysis of RNAseq experiments. a**, Bacterial population in Arabidopsis leaves at 3h or 6h post infiltration. Data are displayed by mean  $\pm$  s.d. ( $n = 3$ ). **b**, A Venn diagram showing numbers of differentially expressed genes (DEGs) 3h after D36E or D36E(*avrRpt2*) infection in Col-0 plants. **c-e**, Heat-maps of SA- (**c**; genes extracted from Karolina et al., 2012<sup>61</sup>), jasmonate- (**d**; genes extracted from Hickman et al., 2017<sup>62</sup>) and ethylene-(**e**; genes extracted from Nemhauser et al.,2006<sup>63</sup>) responsive genes.

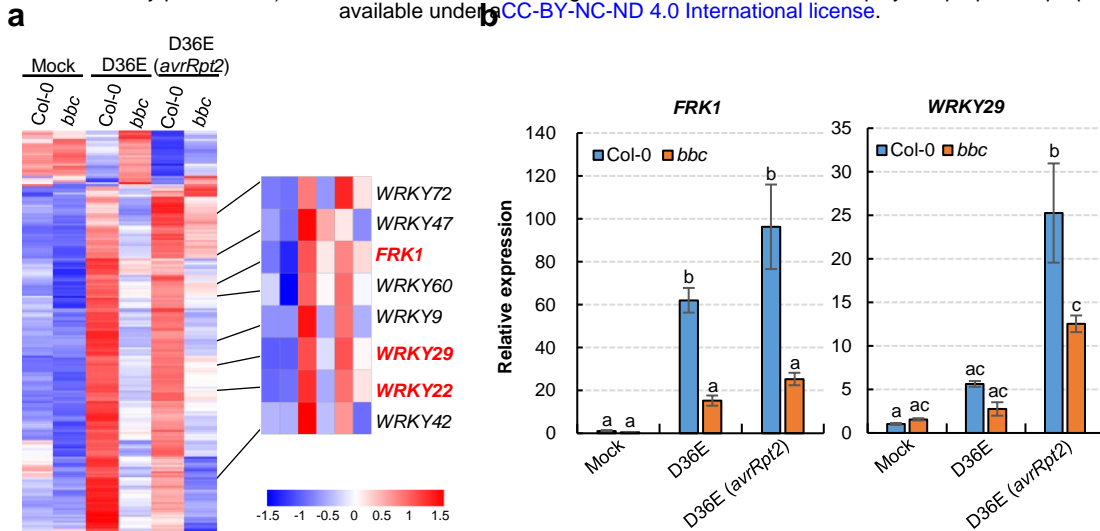

**Extended Data Fig.8| The WRKY-FRK1 is a unique immune branch and can not be restored by ETI in *bbc* mutant.** **a**, Heat map of the 272 DEGs in the *bbc* plant compared to Col-0 plant after D36E (*avrRpt2*) infection, with the canonical PTI pathway genes highlighted in red. **b**, qRT-PCR of *FRK1* and *WRKY29* expression level in Col-0 and *bbc* plants 3h after infiltration with different strains or Mock. (mean  $\pm$  s.e.m.;  $n = 3$ ; statistical analysis by two-way ANOVA;  $p < 0.05$ ; different letters indicate statistically significant difference). Experiments were repeated at least three times with similar trends.

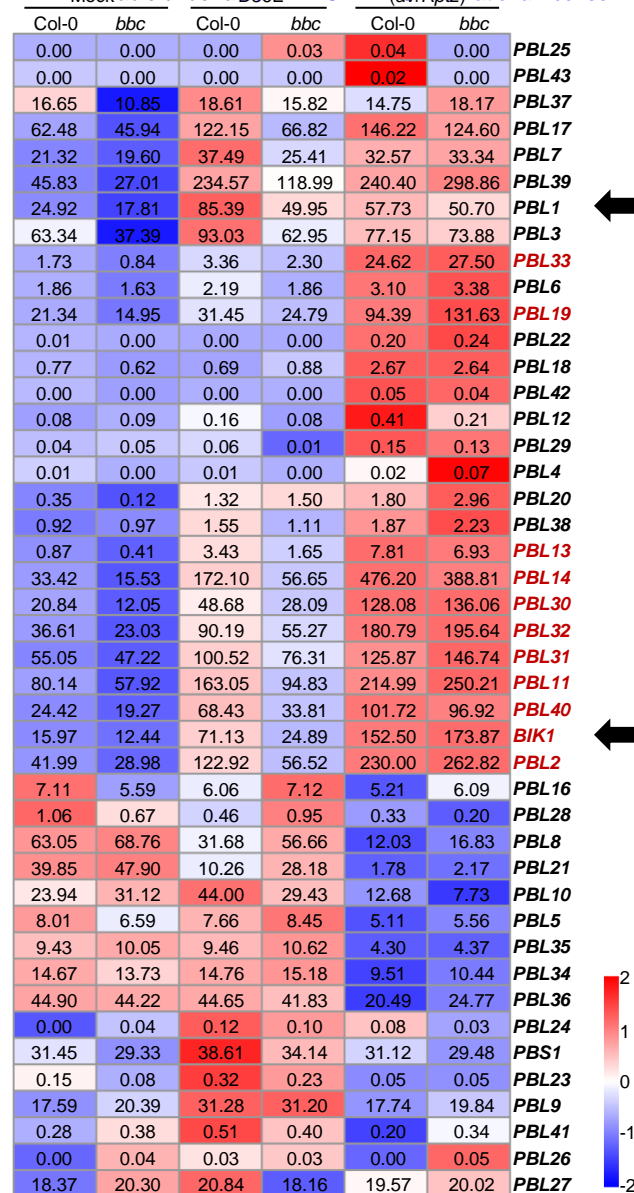

**Extended Data Fig.9| Heat map of *BIK1/PBL* family gene expression in the RNaseq experiment.** Numerical values indicate expression level calculated by TPM (Transcripts per Kb of exon model per Million). Genes labeled in red show significant up-regulation after D36E(*avrRpt2*) inoculation, compared to mock and D36E inoculation, in Col-0 and *bbc* plants. Arrows indicate *BIK1* and *PBL1* genes.

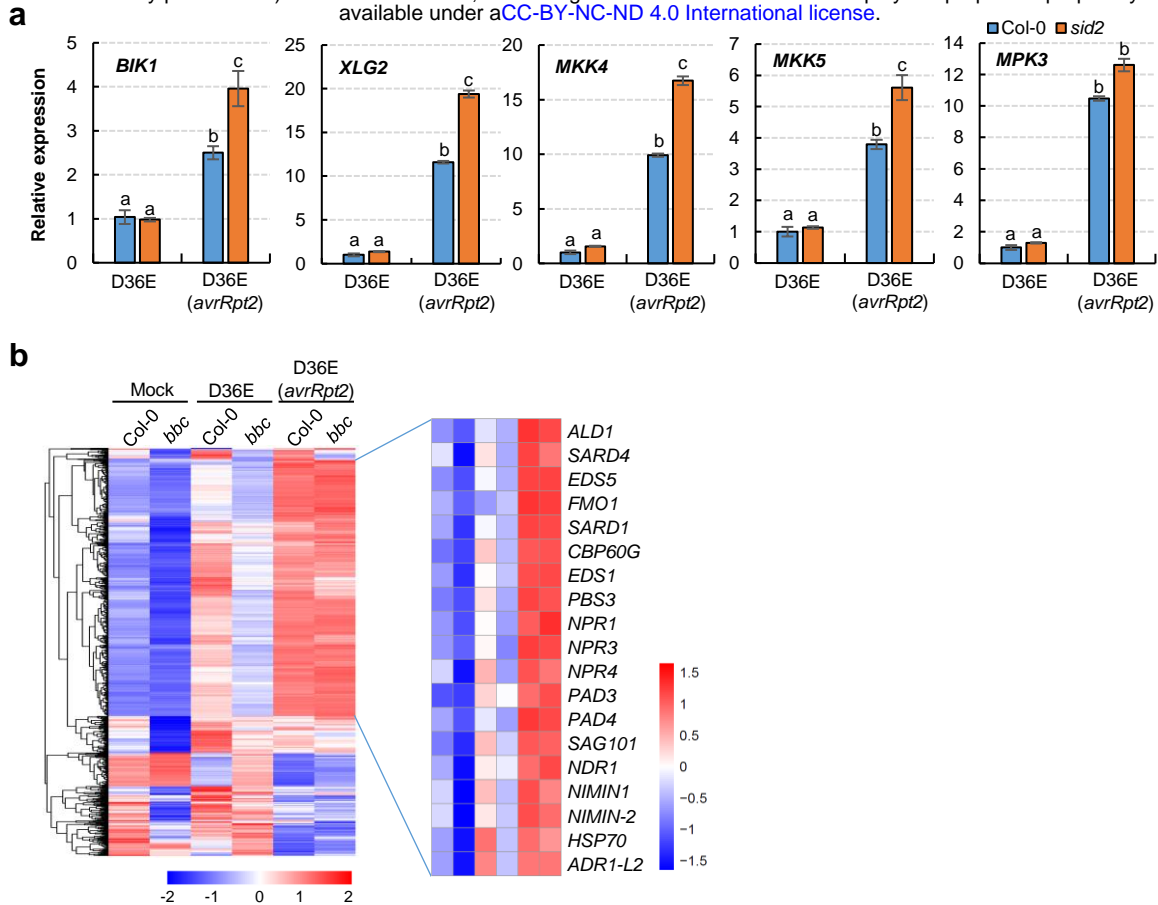

**Extended Data Fig.10| Up-regulation of key PTI component genes by AvrRpt2-triggered ETI seems to be independent of SA/NHP. a,** qRT-PCR analysis of *BIK1*, *XLG2*, *MKK4*, *MKK5* and *MPK3* expression levels in Col-0 and *sid2* plants 3h after infiltration with D36E or D36E(*avrRpt2*). Different letters indicate statistically significant differences, as analyzed by two-way ANOVA (mean  $\pm$  s.e.m.;  $n \geq 3$ ;  $p < 0.05$ ). Experiments were repeated at least three times with similar trends. **b,** Heat-maps of NHP-responsive genes (extracted from Hartmann et al., 2018<sup>64</sup>, defined by genes that are responsive to pipecolic acid and depend on FMO1 for expression) in the Col-0 and *bbc* plants in our RNAseq experiment.
